Running head: THE STOK FILTER FOR TIME-VARYING CONNECTIVITY

1 **Title**

2

3

4

5

6

7

8

9 **Modeling time-varying brain networks with a self-**  
10 **tuning optimized Kalman filter**

11 D. Pascucci<sup>1,2</sup>, M. Rubega<sup>3,4</sup>, G. Plomp<sup>1</sup>

12 <sup>1</sup>Perceptual Networks Group, University of Fribourg, Fribourg, Switzerland.

13 <sup>2</sup>Laboratory of Psychophysics, Brain Mind Institute, École Polytechnique Fédérale de Lausanne (EPFL), Lausanne,  
14 Switzerland.

15 <sup>3</sup>Functional Brain Mapping Lab, Department of Fundamental Neurosciences, University of Geneva, Geneva,  
16 Switzerland.

17 <sup>4</sup>Department of Neurosciences, University of Padova, Padova, Italy.

18

19

20 Short title: THE STOK FILTER FOR TIME-VARYING CONNECTIVITY

21

22

23

24

25

26

27

28

29 \*corresponding author: david.pascucci@epfl.ch

30

31

## 32 **Abstract**

33 Brain networks are complex dynamical systems in which directed interactions between different areas  
34 evolve at the sub-second scale of sensory, cognitive and motor processes. Due to the highly non-  
35 stationary nature of neural signals and their unknown noise components, however, modeling dynamic  
36 brain networks has remained one of the major challenges in contemporary neuroscience. Here, we  
37 present a new algorithm based on an innovative formulation of the Kalman filter that is optimized for  
38 tracking rapidly evolving patterns of directed functional connectivity under unknown noise  
39 conditions. The Self-Tuning Optimized Kalman filter (STOK) is a novel adaptive filter that embeds  
40 a self-tuning memory decay and a recursive regularization to guarantee high network tracking  
41 accuracy, temporal precision and robustness to noise. To validate the proposed algorithm, we  
42 performed an extensive comparison against the classical Kalman filter, in both realistic surrogate  
43 networks and real electroencephalography (EEG) data. In both simulations and real data, we show  
44 that the STOK filter estimates time-frequency patterns of directed connectivity with significantly  
45 superior performance. The advantages of the STOK filter were even clearer in real EEG data, where  
46 the algorithm recovered latent structures of dynamic connectivity from epicranial EEG recordings in  
47 rats and human visual evoked potentials, in excellent agreement with known physiology. These  
48 results establish the STOK filter as a powerful tool for modeling dynamic network structures in  
49 biological systems, with the potential to yield new insights into the rapid evolution of network states  
50 from which brain functions emerge.

51

## 52 **Author summary**

53 During normal behavior, brains transition between functional network states several times per second.  
54 This allows humans to quickly read a sentence, and a frog to catch a fly. Understanding these fast  
55 network dynamics is fundamental to understanding how brains work, but up to now it has proven  
56 very difficult to model fast brain dynamics for various methodological reasons. To overcome these  
57 difficulties, we designed a new Kalman filter (STOK) by innovating on previous solutions from  
58 control theory and state-space modelling. We show that STOK accurately models fast network  
59 changes in simulations and real neural data, making it an essential new tool for modelling fast brain  
60 networks in the time and frequency domain.

61

62

## 63 **Introduction**

64 Neural systems like the human brain exhibit highly dynamical patterns of neuronal interactions that  
65 evolve very quickly, at timescales of tens to hundreds of milliseconds. These temporal dynamics are  
66 fundamental for the coordination of large-scale functional networks at various oscillatory frequencies  
67 (1–4), both during rest (5–7) and in response to environmental events (8–11). It is from such rapid  
68 and continuous reorganization of distributed neuronal interactions that sensory, motor and cognitive  
69 functions most likely arise (1–3). To understand the workings of complex neural systems, it is  
70 therefore important to develop adequate models of their intrinsic dynamics that rely on the accurate  
71 estimation of time-varying functional connectivity patterns (12–16).

72 In the last decades, analysis of large-scale brain networks has successfully characterized the  
73 spatial layout and topology of functional connections (16–20), but their temporal dynamics have  
74 remained largely unexplored. The focus on network topologies instead of dynamics persists even  
75 though neural recordings with high temporal resolution are now readily available from advanced  
76 electrophysiology and neuroimaging techniques (21–25). A major issue in modeling dynamic  
77 networks, particularly in the context of event-related responses, originates from the highly non-  
78 stationary nature of neural activity. Non-stationary signals pose severe modeling problems because  
79 of their unstable statistical properties, their time-varying spectral components and the multiple  
80 unknown sources of noise they contain (22,24,26). To circumvent some of these problems, dynamic  
81 functional connectivity has been mostly estimated in a static or quasi-static sense, using for instance  
82 stationary measures applied to relatively long sliding windows (27–29). Alternatively, model-based  
83 (30) and Markov Chain Monte Carlo methods (31,32) have been proposed for estimating dynamic  
84 connectivity under detailed a priori assumptions about the candidate generative processes and number  
85 of functional states (4,31,33,34). Given the fast and flexible nature of brain activity, however, it is  
86 essential to move beyond static approximations of dynamical systems. This requires new algorithms  
87 that allow data-driven and large-scale exploration of functional brain networks at the sub-second scale  
88 of sensory, cognitive and motor processes.

89 Here, we present a new algorithm derived from control theory that is specifically designed to  
90 model dynamic changes in large-scale functional networks: the *Self-Tuning Optimized Kalman filter*  
91 (STOK). STOK belongs to the family of linear adaptive filters for estimating the temporal evolution  
92 of states in dynamical systems (35) and inherits the fundamental concepts of Kalman filtering (36).  
93 The STOK filter combines three innovative solutions that set it apart from existing algorithms: 1) a  
94 simple least-squares minimization to recover latent and dynamic functional connectivity states  
95 through the adaptive estimation of time-varying multivariate autoregressive processes (tvMVAR),  
96 without any explicit approximation of unknown noise components; 2) a recursive regularization that

97 guarantees robustness against noise while preventing overfitting; 3) a self-tuning memory decay that  
98 adapts tracking speed to time-varying properties of the data, increasing the sensitivity to rapid  
99 transitions in connectivity states. Together, these three innovations define a new adaptive filter for  
100 modeling latent connectivity structures from fast-changing neural signals with unknown noise  
101 components.

102 We present an extensive validation of the proposed algorithm using a new simulation  
103 framework that mimics the realistic behavior of large-scale biological networks, and two datasets of  
104 event-related potentials recorded in rodents and humans. In all quantitative tests and comparisons  
105 against the general linear Kalman filter (KF; 37,38), we found that STOK shows unprecedented  
106 ability and precision in tracking the temporal dynamics of directed functional connectivity. The  
107 results establish the STOK filter as an effective tool for modeling large-scale dynamic functional  
108 networks from non-stationary time-series.

109 In the Methods section, we provide a detailed technical description of the STOK filter and of  
110 the limitations of the KF that it overcomes. Matlab and Python code for STOK, KF and the simulation  
111 framework are available on GitHub ([https://github.com/PscDavid/dynet\\_toolbox](https://github.com/PscDavid/dynet_toolbox);  
112 <https://github.com/joanrue/pydynet>).

## 113 **Results**

### 114 *Simulations*

115 A critical first step in the validation of the STOK filter was to evaluate whether the new filter  
116 successfully overcomes a well-known limitation of KF: the dependency of the filter's performance  
117 on a free parameter—the adaptation constant  $c$  (see Methods), that determines the trade-off between  
118 tracking speed and smoothness of the estimates. As a proof of concept, we first compared a non-  
119 regularized version of the STOK filter against the KF in a simple two-nodes simulation. We used a  
120 bivariate AR(1) process (samples = 1000,  $F_s$  = 200 Hz, trials = 200) to generate signals with fixed  
121 univariate coefficients ( $A[1,1] = A[2,2] = 0.9$ ) and a short sequence of causal influences from one  
122 node to the other ( $A[1,2] = 0.5$ ). The results illustrate how KF performance depends critically on the  
123 fixed adaptation constant  $c$ . KF showed poor tracking ability at the lower bound ( $c = 0.0001$ ) and  
124 large noisy fluctuations at the higher bound ( $c = 1$ ) (Fig. 1A). In contrast, the STOK filter thanks to  
125 its self-tuning  $c$  automatically maintained a good level of performance by increasing its tracking speed  
126 at the on- and offsets of time-varying connections (Fig. 1B). Computing the root-mean squared error  
127 against the imposed connection indicated that the optimal  $c$  for KF lies at a point, within the two  
128 extremes, where the estimated coefficients from both filters are maximally correlated (Fig. 1A,  
129 bottom plot). Note that, however, the determination of the optimal  $c$  in real data is not straightforward

## Running head: THE STOK FILTER FOR TIME-VARYING CONNECTIVITY

130 and no objective or universal criteria are available (39). This simulation shows that STOK can reach  
131 the peak performance of KF without prior selection of an optimal adaptation constant.

132

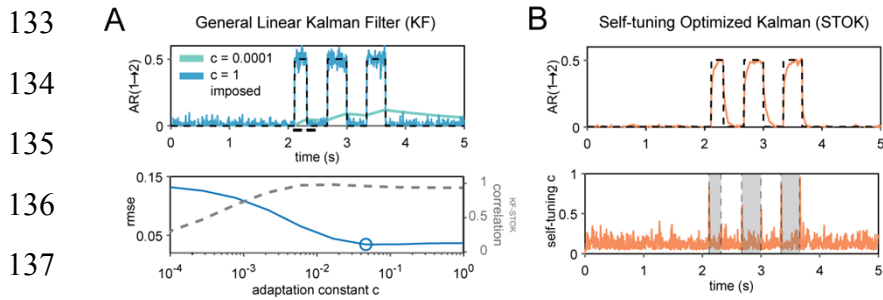

138

139 **Fig. 1. Performance of KF and STOK on a simple simulated bivariate AR(1) process.** (A) Performance of the KF  
140 filter at recovering the imposed structure of AR coefficients (top panel; black dashed lines) under two extreme values of  
141 the adaptation constant ( $c = 0.0001$ ,  $c = 1$ ), highlighting the drastic variability of the estimates as a function of  $c$ : poor  
142 tracking performance is observed at the lowest (cyan line) and spurious noisy fluctuations at the highest  $c$  (blue line). The  
143 optimal  $c$  that minimizes the root-mean squared error (rmse, blue line), lies at a point where KF and STOK performance  
144 are highly correlated (bottom panel; correlation shown by the grey dashed line). (B) Performance of the STOK filter,  
145 showing the high tracking ability and robustness to noise due to the self-tuning memory decay (top panel; orange line)  
146 which automatically increases tracking speed at relevant transition points between AR coefficient states (bottom panel;  
147 grey rectangles).

148

149 To statistically compare KF and STOK, we used a realistic framework with complex patterns  
150 of connectivity in the time and frequency domain. Our simulation framework allows for parametric  
151 variations of various signal aspects that can be critical in real neural data (see Methods; Simulation  
152 framework). As a first test, we evaluated the effect of regularization and the robustness of each filter  
153 against noise, comparing the performance of KF, STOK without regularization and STOK under  
154 different levels of SNR (0.1, 1, 3, 5, 10 dB). We used detection theory to compare simulated  
155 functional connectivity and estimated connectivity from KF and STOK, with area under the curve  
156 (AUC) as the performance metric (see Fig. 2A and Methods). AUC values from 0.7 to 0.8 indicate  
157 fair performance, AUC from 0.8 to 0.9 indicate good performance (40). A repeated measures  
158 ANOVA with factors Filter Type (KF, STOK without regularization, STOK) and signal-to-noise ratio  
159 (SNR), revealed a statistically significant interaction ( $F(8, 232) = 68.54$ ,  $p < 0.001$ ,  $\eta_p^2 = 0.70$ ; Fig.  
160 2B). This effect demonstrated the advantages of regularization: STOK showed better performance  
161 than KF across all noise levels (paired t-test, all  $p < 0.001$ ), but the non-regularized STOK  
162 outperformed KF only for SNR larger than 0.1 (paired t-test,  $p(\text{SNR} = 0.1) > 0.05$ ; all other  $p < 0.01$ ).  
163 Therefore, we kept regularization as a default component of STOK.

164

Running head: THE STOK FILTER FOR TIME-VARYING CONNECTIVITY

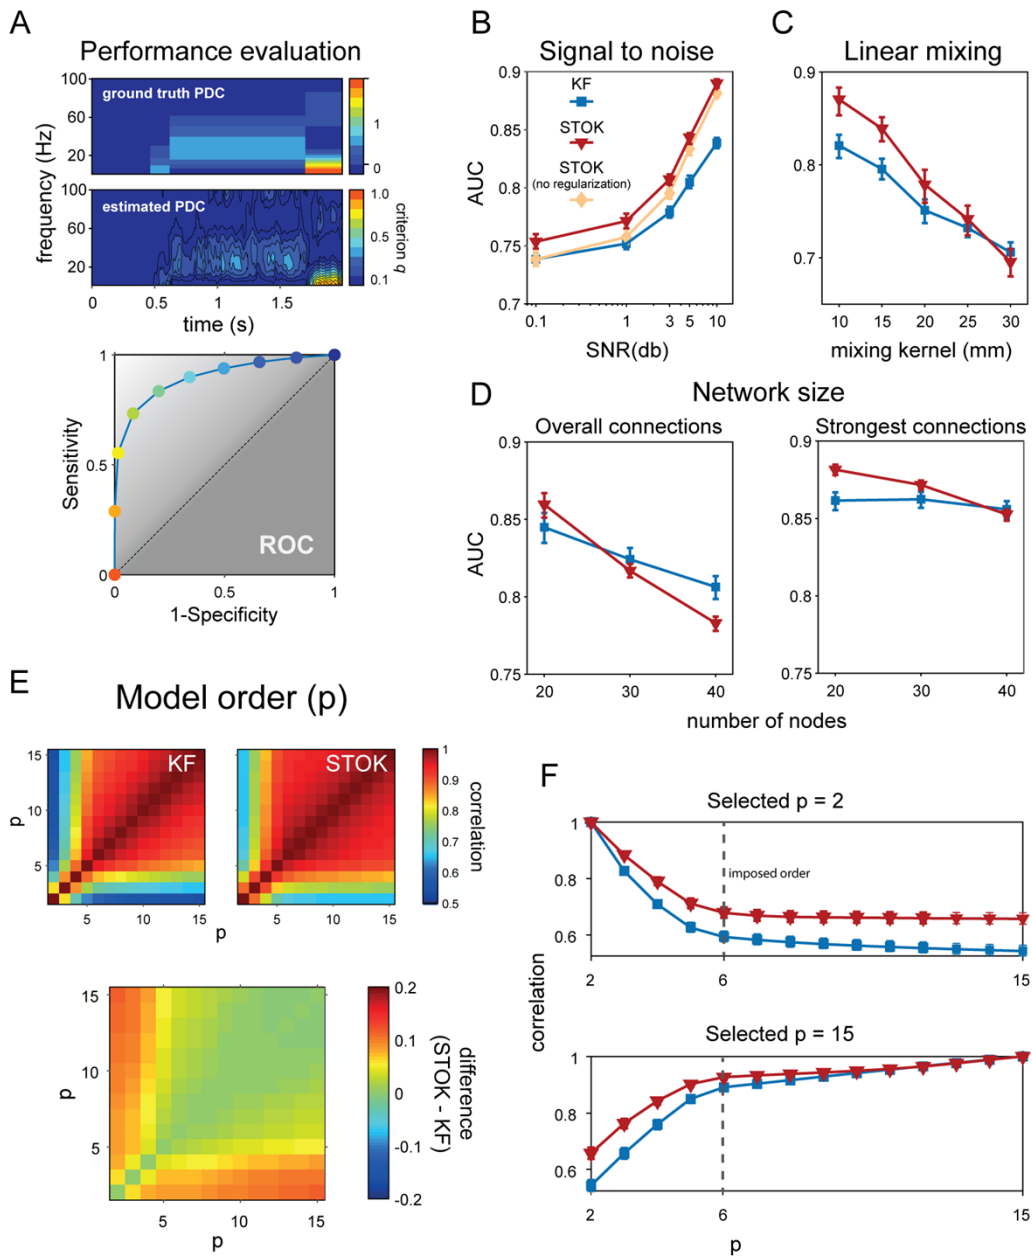

165

166

167 **Fig. 2. Comparison of the KF and STOK filters under the realistic simulation framework.** (A) Method for evaluating  
 168 the performance of KF and STOK against simulated data (ground truth). Ground truth PDC was binarized setting to 1 all  
 169 connections larger than 0. Estimated Partial Directed Coherence (PDC) (41) was binarized using different criteria, based  
 170 on the quantile discretization of the estimates (*criterion  $q$* ; top panel). Signal detection indexes were calculated for each  
 171 criterion and the area under the curve (AUC) was used as performance measure. The color code of the dots in the ROC  
 172 plot (bottom panel) reflects the different criteria and correspond to the colorbar for estimated PDC strength (top panel).  
 173 (B) Comparison of KF; STOK without regularization and STOK as a function of different SNR, showing the overall  
 174 larger AUC using STOK. Error bars reflect 95% confidence intervals. (C) AUC curves for KF and STOK as a function  
 175 of linear mixing. (D) Performance of the two filters with increasing sample size: regularization favors strongest  
 176 connections and sparse networks as the network size increases (right panel), reducing overall weakest connections (left  
 177 panel). (E) Correlation matrices at varying model orders for KF and STOK (top two panels) and their difference (bottom  
 178 panel, STOK minus KF). (F) Correlations extracted at specific orders ( $p \in [2, 15]$ , with ground-truth model order = 6)  
 179 showing the higher consistency of models estimated as  $p$  changes with STOK compared with KF.

180



Running head: THE STOK FILTER FOR TIME-VARYING CONNECTIVITY

181 As a second test, we evaluated the robustness of KF and STOK against instantaneous linear  
182 mixing. Linear mixing, or spatial leakage (42,43), is an important issue when estimating functional  
183 connectivity from magneto- and electro-encephalographic data (M/EEG) because the  
184 multicollinearity and non-independence of multiple time-series can lead to spurious connectivity  
185 estimates (44,45). Spatial leakage usually contaminates signals in nearby sources with a mixing  
186 profile that is maximal at around 10-20 mm of distance and fades out exponentially at around 40-60  
187 mm (42–44). To simulate linear mixing, we randomly assigned locations in a two-dimensional grid  
188 (150x150 mm) to each node of the surrogate networks ( $n = 10$ ) and we convolved the signals, at each  
189 time point, with a spatial Gaussian point spread function (mixing kernel) of different standard  
190 deviations (10, 15, 20, 25, 30 mm). We then evaluated performance of the KF and STOK filters as a  
191 function of the mixing kernel width (Fig. 2C). The results of a repeated measures ANOVA revealed  
192 an interaction between Filter Type and Mixing Kernel ( $F(4, 116) = 23.99, p = 0.009, \eta_p^2 = 0.45$ ), with  
193 STOK outperforming KF for mixing functions up to 20 mm of width (paired t-test,  $p < 0.001$ ). These  
194 results suggest that the STOK filter is preferred for small and intermediate mixing profiles that are  
195 observed in source imaging data (42,43) and in connectivity results (44). For higher mixing levels,  
196 the filters showed indistinguishable but still fair performance.

197 Another critical aspect that determines the quality of the estimated parameters in the context  
198 of both multi-trial Kalman filtering (46,47) and ordinary least-squares solutions (48,49) is the number  
199 of parameters (e.g., nodes in the network). In general, to obtain robust parameter estimates and to  
200 avoid overfitting, a small ratio between parameters and number of trials is recommended (the one-in-  
201 ten rule of thumb) (50–52). When this ratio is large (many parameters, few trials), the model is  
202 underdetermined and in this case regularization may help to prevent overfitting and to ensure that a  
203 unique solution is found (53). Thus, increasing the number of nodes in our simulation allowed to test  
204 the behavior of the KF and STOK filters, as well as the effect of regularization, as the number of  
205 parameters in the model increased. We ran a set of simulations with fixed numbers of trials ( $n = 200$ )  
206 and increasing number of nodes (20, 30, 40). As expected, a repeated measures ANOVA with factors  
207 Filter Type and Number of Nodes revealed a significant interaction ( $F(2, 58) = 112.28, p < 0.001, \eta_p^2$   
208  $= 0.79$ ; Fig. 2D) showing a decrease in performance with increasing number of nodes (main effect of  
209 the Number of Nodes,  $F(2, 58) = 63.68, p < 0.001, \eta_p^2 = 0.68$ ). The interaction was due to a faster  
210 performance decrease for the STOK filter, which performed below KF levels for 30 and 40 nodes  
211 (paired t-test,  $p < 0.01$ ).

212 Regularization is designed to shrink weak coefficients toward zero and retain the strongest  
213 connections. We therefore examined whether the greater sensitivity to the number of nodes for the  
214 STOK filter was due to the diminishing of existing weak connections, by quantifying performance

Running head: THE STOK FILTER FOR TIME-VARYING CONNECTIVITY

215 for the strongest connections only (magnitude above the 50% quantile). This reanalysis revealed an  
216 interaction between Filter Type and Number of Nodes ( $F(2, 58) = 45.73, p < 0.001, \eta_p^2 = 0.61$ ; Fig.  
217 2D) in which the STOK outperformed KF for networks with 20 and 30 nodes (paired t-test,  $p < 0.001$ ),  
218 while there was no significant difference for 40 nodes. Thus, for large-scale networks with a  
219 suboptimal ratio between the number of nodes and the number of trials, the regularized STOK filter  
220 provides a reliable sparse solution that accurately tracks the strongest dominant connections, while  
221 potentially preventing overfitting. Note that overall, however, performance was relatively good for  
222 both filters ( $AUC > 0.75$ ).

223 As a final test in simulations, we investigated the robustness against variations in model order.  
224 The model order  $p$  (eq. [2]) is a key free parameter in tvMVAR modelling that determines the amount  
225 of past information used to predict the present state influencing the quality and frequency resolution  
226 of the estimated auto-regressive coefficients (Porcaro, Zappasodi, Rossini, & Tecchio, 2009a; Seth,  
227 2010). Whereas previous work has shown that the multi-trial KF is relatively robust to variations in  
228 model order (46,54), we asked whether the innovations in STOK also make it more robust against  
229 changes in model order. We simulated data with an imposed order of  $p = 6$  samples, and estimated  
230 PDC for both the STOK and the KF using a range of model orders from  $p = 2$  to  $p = 15$ . As shown  
231 in Fig. 2E-F, the correlation between PDC values obtained with different  $p$  was overall higher for the  
232 STOK filter than for the KF. Particularly, the correlation was higher not only for  $p \geq 6$ , but also for  
233 smaller model orders, that usually lead to biased PDC estimates and poor frequency resolution.

234 In sum, the four tests in a realistic simulation framework showed that the STOK filter has  
235 superior performance, higher tracking accuracy and greater robustness to noise than the KF. STOK  
236 achieves these results without the need to set an adaptation constant, and with greater robustness to  
237 selecting a sub-optimal model order, two properties that are highly desirable when modeling real  
238 neural time-series. We next tested STOK performance in event-related EEG data recorded during  
239 whisker stimulation in rats, and during visual stimulation in humans.

240

241 *Somatosensory evoked potentials in rat*

242 To compare STOK and KF along two objective performance criteria we used epicranial EEG  
243 recordings in rats from a unilateral whisker stimulation protocol (54–57). Criterion I tests the ability  
244 to detect contralateral somatosensory cortex (cS1, electrode e4) as the main driver of evoked activity  
245 at short latencies after whisker stimulation (8-14 ms) in the gamma frequency band (40-90 Hz).  
246 Criterion II tests the identification of parietal and frontal areas (e2 and e6, respectively) as the main  
247 targets of cS1 (e4) in the gamma band, at early latencies (54,56). To evaluate criterion I, we compared  
248 the summed outflow from cS1 with the largest summed outflow observed from the other nodes. To



Running head: THE STOK FILTER FOR TIME-VARYING CONNECTIVITY

249 evaluate criterion II, we compared functional connectivity strengths from cS1 to e2 and e6 to that of  
250 the strongest connection directed to any of the other nodes. To determine the latencies at which KF  
251 and STOK are able to reliably identify cS1 as the main driver, and parietal-frontal cortex as their main  
252 targets, both criteria were evaluated at each timepoint around whisker stimulation (from -10 to +60  
253 ms).

254 We evaluated performance on the two criteria using different sampling rates (1000 Hz, 500  
255 Hz). The sampling rate determines the number of lags required to use a given model order in  
256 milliseconds, thus, it also determines the number of parameters in the model and the risk of overfitting  
257 (58). Previous work has demonstrated that downsampling can have adverse effects on connectivity  
258 estimates (54,59) and that multi-trial KF requires lower sampling rates to achieve good performance  
259 (e.g., 500 Hz for the present dataset, 54). For comparison, the model order for both methods and the  
260 adaptation constant for the KF were set to their previously reported optimal values ( $p = 4$  ms;  $c =$   
261 0.02) (54).

262

263

264

265

266

267

268

269

Running head: THE STOK FILTER FOR TIME-VARYING CONNECTIVITY

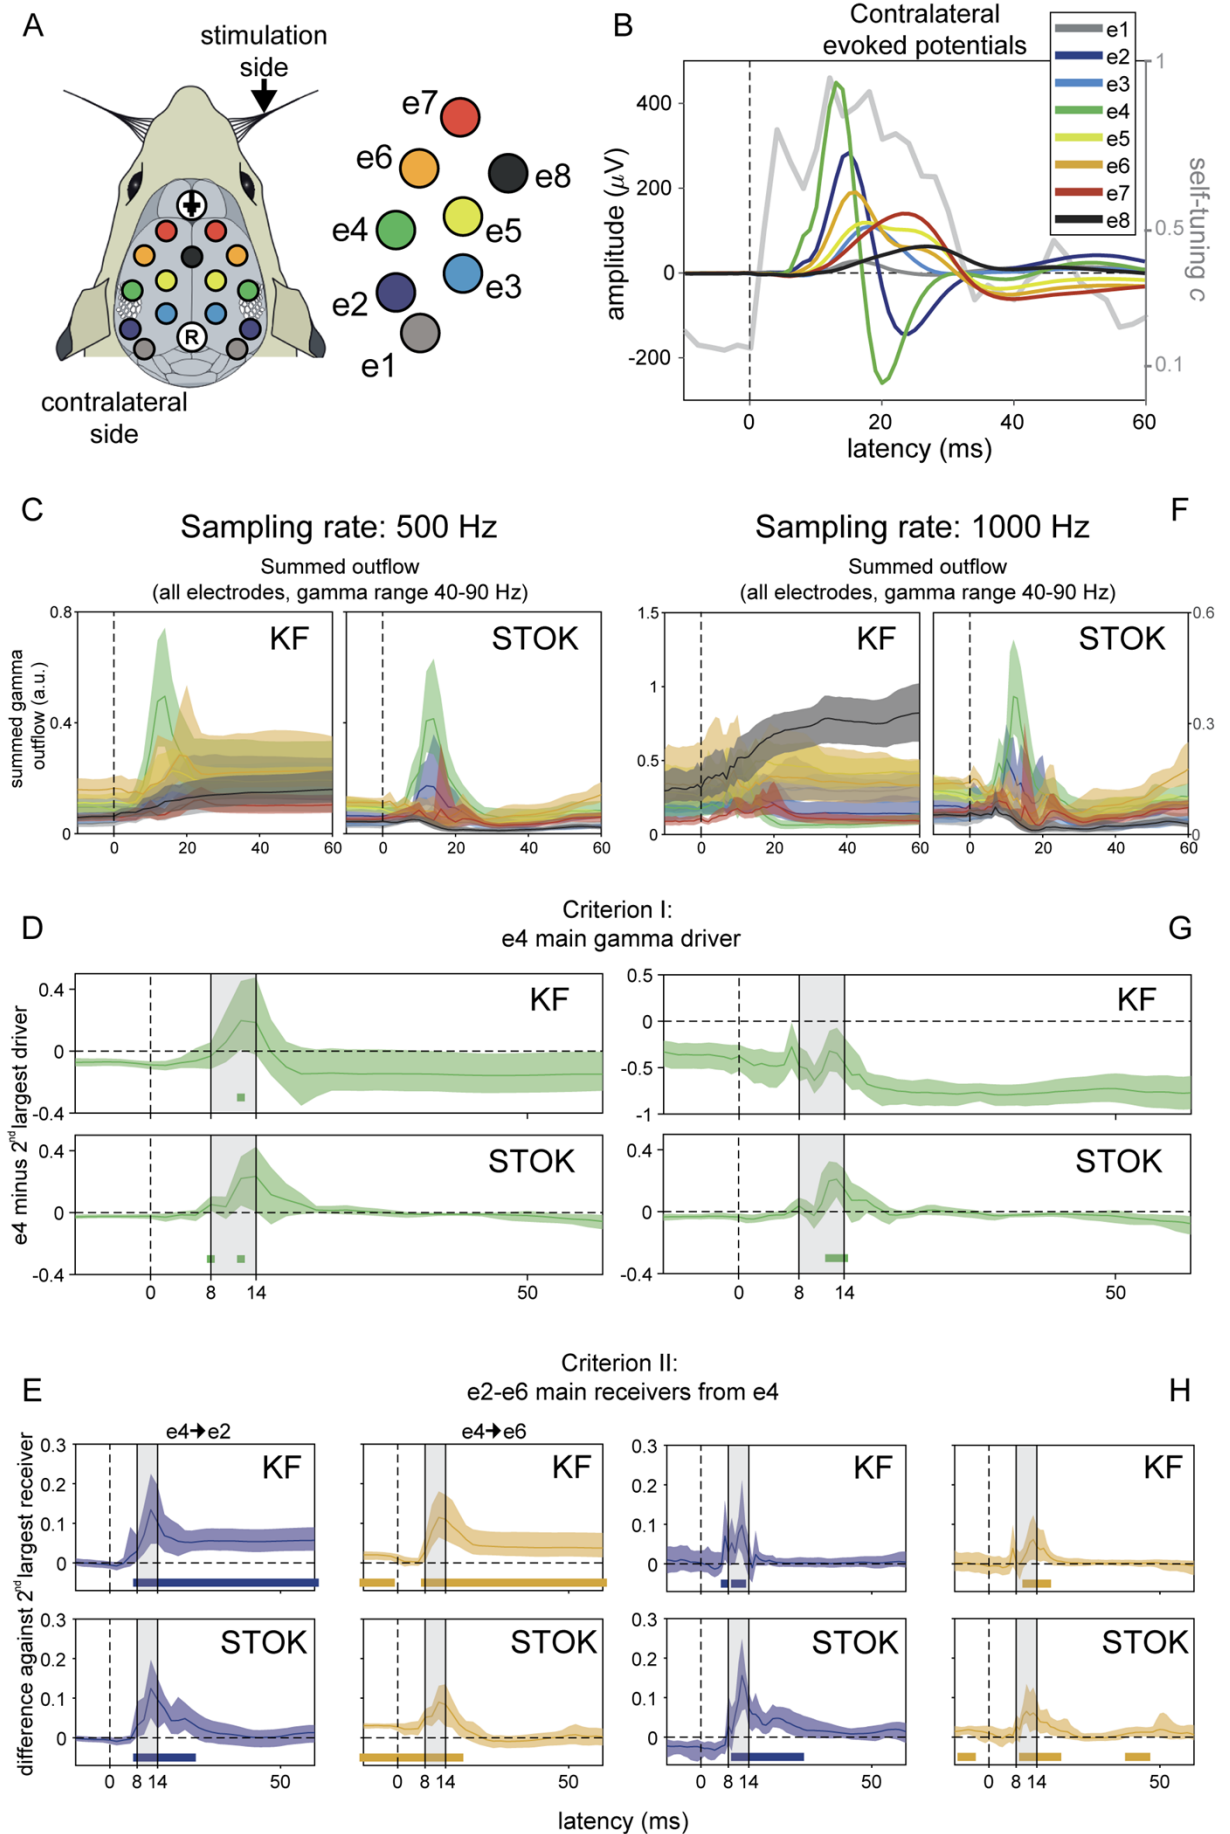

Running head: THE STOK FILTER FOR TIME-VARYING CONNECTIVITY

271 **Fig. 3. Results in benchmark rat EEG.** (A) Layout of the multi-electrode grid used for recordings with the electrode  
272 and label codes used for all the plots. (B) Grand-average somatosensory evoked potentials at electrodes contralateral to  
273 stimulation ( $n = 10$ ) showing the sequence of maximum voltage peaks, starting at e4 and propagating to e2-6. The gray  
274 line shows the evolution of the self-tuning memory parameter of the STOK filter. (C) Summed outflow in the gamma  
275 range (40-90 Hz) from all electrodes at the sampling rate of 500 Hz, revealing similar dynamics estimated with KF and  
276 STOK, but higher temporal precision with STOK filtering. (D-E) Criterion I and II: STOK and KF similarly identified e4  
277 as the main driver at expected latencies (top panel), however, STOK recovered more temporally localized dynamics and  
278 evoked patterns in the total inflow of gamma activity from e4 to the two main targets e2-e6 (bottom panel). Colored  
279 squares at the bottom of each plot indicate time points of significance after bootstrap statistics ( $n = 10000$ ,  $p < 0.05$ ; see  
280 Results). (F-H) Same set of results using a sampling rate of 1000 Hz, revealing the compromised estimates of KF and the  
281 consistent and almost invariant results obtained with STOK.  
282

283 At a sampling rate of 500 Hz, both the KF and the STOK filter revealed a peak in the summed  
284 gamma outflow from cS1 at early latencies from whisker simulation, Fig. 3C. Both filters identified  
285 cS1 as the main driver (criterion I), by showing a significant increase of summed gamma outflow  
286 from cS1 at the expected latencies (bootstrap distribution of differences against the 2<sup>nd</sup> largest driver  
287 at each time point,  $n[\text{bootstrap}] = 10000$ ,  $p < 0.05$ ; Fig. 3D). Similarly, for criterion II both methods  
288 identified e2 and e6 as the main targets of cS1 gamma influences, but the pattern was more restricted  
289 to the temporal window of interest in the STOK results (bootstrap distribution against the 2<sup>nd</sup> largest  
290 receiver at each time point; Fig. 3E).

291 At the higher sampling rate of 1000 Hz, the STOK filter returned an almost identical pattern  
292 of outflow and good performance on both criteria (Fig. 3F-H). The KF, however, presented  
293 inconsistent outflows and poor performance on criterion I, failing to identify cS1 (e4) as the main  
294 driver of gamma activity. On criterion II, KF still performed well at high sampling rate (Fig. 3H).

295 Overall, these benchmark results in real data show that STOK performs well on both  
296 performance criteria. In addition, it suggests that STOK has better specificity in the temporal domain,  
297 as compared to the KF results that presented interactions persisting at longer latencies without  
298 returning to baseline. Importantly, STOK performance was unaffected by downsampling.  
299

### 300 Visual evoked potentials in human

301 As a final step, we compared the STOK and KF filters in real human EEG data from a motion  
302 discrimination task. The processing of coherent visual motion is known to induce characteristic time-  
303 frequency patterns of activity in cortical networks, with early selective responses occurring from 150  
304 ms after stimulus onset (60,61) that likely originate in temporo-occipital regions (e.g., MT+/V5, V3a),  
305 and more pronounced responses from 250 ms on (62,63). A hallmark of coherent motion processing  
306 is the induced broadband gamma activity from about 200 ms onward (64–66), which is usually  
307 accompanied by event-related desynchronization in the alpha band (67).

Running head: THE STOK FILTER FOR TIME-VARYING CONNECTIVITY

308           To evaluate the performance of the STOK and KF filters at recovering known dynamics of  
309 coherent motion processing, we first compared the parametric power spectral density (PSD) obtained  
310 with each filter against the non-parametric PSD computed using Morlet wavelet convolution with  
311 linearly increasing number of wavelet cycles (from 3 to 15 cycles over the 1-100 Hz frequency range  
312 of interest; see Methods). As shown in Fig. 4C, KF and STOK recovered the main expected dynamics  
313 in a qualitatively similar way as the non-parametric estimate. However, the STOK PSD showed  
314 significantly higher correlation with the non-parametric PSD as compared to the one obtained with  
315 the KF (Fig. 4D,  $r_{KF} = 0.53 \pm 0.18$ ;  $r_{STOK} = 0.85 \pm 0.05$ ;  $p < 0.001$ ). This shows that STOK produces  
316 more consistent PSD estimates across participants than KF. We note that both parametric methods  
317 appear to have higher temporal resolution than the non-parametric one, where temporal smoothing  
318 results from the trade-off between temporal and spectral resolution (68).

Running head: THE STOK FILTER FOR TIME-VARYING CONNECTIVITY

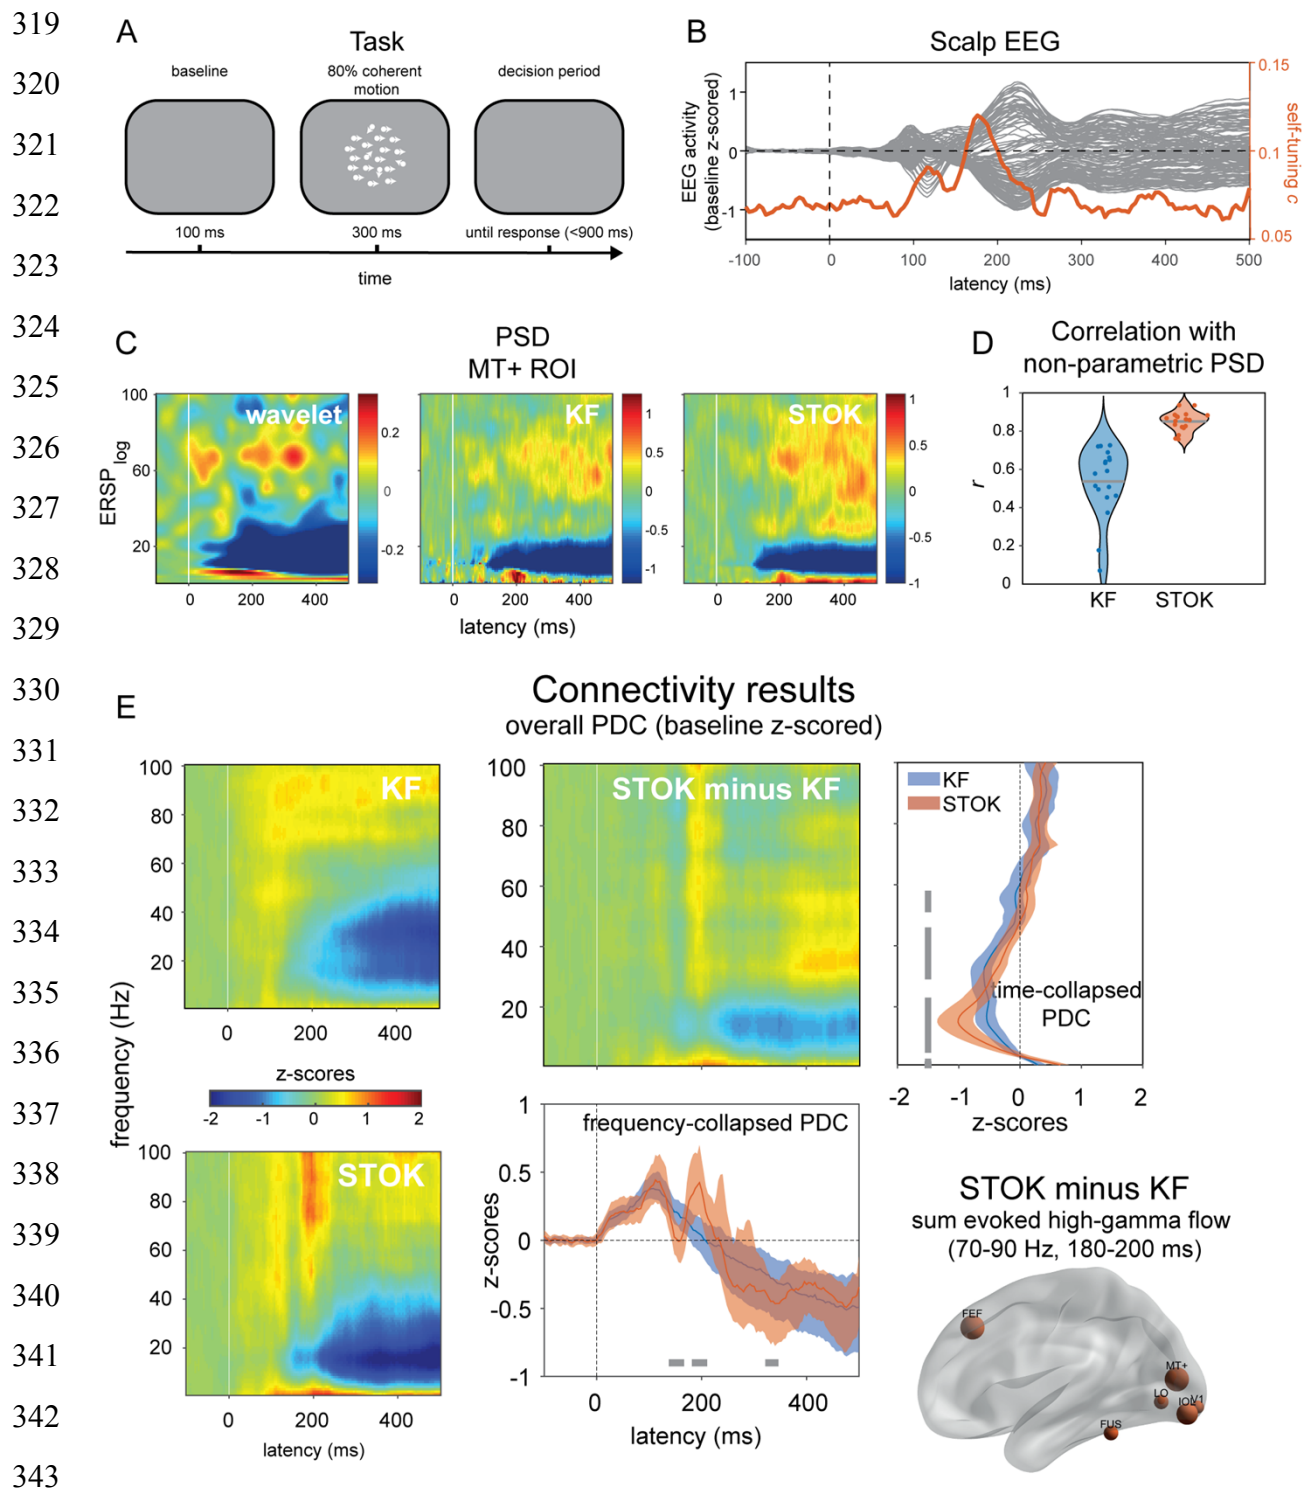

344 **Fig. 4. Results in real human evoked potentials during visual motion discrimination.** (A) The visual motion  
 345 discrimination paradigm presented during EEG recordings. Participants ( $n=19$ ) reported the presence of coherent motion  
 346 in a briefly presented dot kinematogram (300 ms). (B) Shows grand-average event-related responses recorded at the scalp,  
 347 with typical early ( $\sim 100$  ms) and late ( $\sim 200$  ms) components of visual processing. The orange line indicates the temporal  
 348 dynamics detected by the self-tuning memory parameter  $c$ , that increases in anticipation of evident changes in the scalp  
 349 signals. (C-D) Comparison of the non-parametric (wavelet) and parametric power spectrum densities (PSD) obtained with  
 350 KF and STOK for one representative regions (MT+), with the violin plot showing the overall higher (and less variable)  
 351 correlation between wavelet and STOK PSDs. (E) Global connectivity results from KF and STOK. Time-frequency plots  
 352 show the results obtained with the two filters and their difference (STOK minus KF), graphically showing more evident  
 353 dynamics obtained using the STOK filter. Line plots collapsing frequency and time highlight the statistical difference  
 354 between STOK and KF results: STOK recovered multiple dynamic changes in overall connectivity patterns at  
 355 physiologically plausible latencies (bottom plot) and characterized network desynchronization in the alpha range with

356 higher precision (right-side plot). At frequencies (70-90 Hz) and latencies (180-200 ms) of interest for motion  
357 discrimination, the STOK revealed increased contribution to network activity (e.g., increased outflow) from visual  
358 regions, including MT+, and the frontal eye field (FEF; right-bottom plot).  
359

360 We next evaluated the overall time-frequency pattern of evoked functional connections  
361 obtained with STOK and KF. To this aim, we calculated PDC values from the tvMVAR coefficients  
362 estimated with the two filters and we averaged the results across nodes and hemifields. In this way,  
363 we obtained a global connectivity matrix of 16 cortical regions of interest (ROIs; see Methods,  
364 Human EEG) that summarized the evoked network dynamics in the time and frequency domain for  
365 each participant (69). These matrices were then z-scored against a baseline period (from -100 to 0 ms  
366 with respect to stimulus onset) (70) and averaged across participants.

367 The resulting matrices of global event-related PDC changes revealed two critical differences  
368 between the STOK and the KF estimates. Firstly, STOK showed increased specificity in the temporal  
369 domain, as observed after collapsing across frequencies. While both filters showed an initial increase  
370 in global connectivity at early latencies (~110-120 ms post-stimulus), only the STOK filter, after a  
371 significantly faster recovery from the first peak (STOK vs. KF at 144-160 ms,  $p < 0.05$ ), identified a  
372 second peak at critical latencies for motion processing (STOK vs. KF at 188-204 ms,  $p < 0.05$ ) and a  
373 more pronounced decrease of global connectivity at a later stage (STOK vs. KF at 328-340 ms,  $p <$   
374  $0.05$ ; see Fig. 4E). Interestingly, the second peak that STOK identified consisted of increased network  
375 activity in the high gamma band (70-90 Hz), and was due to due to increased outflow from motion-  
376 and vision-related ROIs that included areas MT+, V1 and FEF (see Fig. 4E, bottom right). Secondly,  
377 the STOK filter showed increased specificity in the frequency domain. After collapsing the time  
378 dimension, STOK clearly identified decreased network activity at lower frequencies with a distinct  
379 peak in the higher alpha band (15 Hz), in agreement with the typical event-related alpha  
380 desynchronization, Fig. 4C and E (67). Contrarily, the network desynchronization profile estimated  
381 by the KF was less specific to the alpha range and more spread at lower and middle frequency bands  
382 (Fig. 4E).

## 383 **Discussion**

384 The non-stationarity nature of neuronal signals and their unknown noise components pose a severe  
385 challenge for tracking dynamic functional networks during active tasks and behavior. In the present  
386 work, we have introduced and validated a new type of adaptive filter named the Self-Tuning  
387 Optimized Kalman filter (STOK). The STOK is optimized for tracking rapidly evolving patterns of  
388 directed connectivity in multivariate time-series of non-stationary signals, a challenge that makes  
389 most traditional algorithms inefficient. We designed the new adaptive filter with the goal to provide



Running head: THE STOK FILTER FOR TIME-VARYING CONNECTIVITY

390 a tool for dynamic, frequency-resolved network analysis of multivariate neural recordings that is  
391 computationally efficient.

392 We validated the STOK filter using signal detection theory and an exhaustive battery of tests  
393 in simulated and real data. In a newly developed realistic simulation framework we showed that  
394 STOK outperforms the classical Kalman filter with better estimation accuracy in the time-frequency  
395 domain, higher tracking ability for varying SNR, and greater robustness to noise under signal mixing  
396 and simulated volume conduction effects (42,43). In real data, STOK showed an unprecedented  
397 ability to recover physiologically plausible patterns of time-varying, frequency-resolved functional  
398 connectivity during whisker-evoked responses in rats and during visually evoked EEG responses in  
399 humans. It achieved such performance without any explicit approximation of unknown noise  
400 components and requiring only a single free parameter (the autoregressive model order  $p$ ). Additional  
401 tests demonstrated that STOK performance was robust against variations of the model order and of  
402 the sampling rate, two aspects that are known to be critical for other algorithms (54,55,71). These  
403 results validate STOK as a powerful new adaptive filter, optimized for uncovering network dynamics  
404 in multivariate sets of simultaneously recorded signals. This can have potentially broad applications  
405 in the field of systems and cognitive neuroscience, for the investigation of time-varying networks  
406 using evoked M/EEG response potentials, multi-unit activity, local field potentials (LFPs) and  
407 calcium imaging, or event-locked analyses like spike-triggered averages and traveling waves  
408 (21,23,24,72).

409 The accurate and robust performance of the STOK filter results from innovations based on  
410 existing engineering solutions. These innovations equip the filter with three important strengths: 1) it  
411 overcomes the problem of unknown design components in adaptive filtering (73), 2) it prevents  
412 overfitting and 3) it can track dynamical systems at variable speed (74,75). Below, we discuss each  
413 of these three important properties.

414 To overcome the problem of unknown design components the STOK filter extends an elegant  
415 solution for Kalman filtering under unknown noise components (73) to the case of multi-trial neuronal  
416 and physiological recordings. In Kalman filtering, noise components are covariance matrices that  
417 represent the assumed uncertainty in the data measurements and model parameters. In the simple  
418 form suggested by Nillson (2006), these unknown covariance matrices cancel out in the expression  
419 for the Kalman gain, and a multivariate least-squares reconstruction is used to estimate the latent  
420 process. This leads to a simplified version of the Kalman filter in which no explicit definition of  
421 uncertainty is required. The advantages of this formulation are greatest when sources of uncertainty  
422 cannot be determined in advance, as is the case for recordings of neural activity. Recorded neural  
423 signals are usually contaminated by mixtures of noise that are hardly separable, including

Running head: THE STOK FILTER FOR TIME-VARYING CONNECTIVITY

424 measurement noise, noise from the recording environment, biological artefacts and intrinsic  
425 fluctuations that are not pertinent to the process under investigation (22,24,26). Approaches based on  
426 Kalman filtering can be drastically affected by suboptimal strategies for modelling noise components  
427 (35,73,76). We therefore exploited the rationale and assumptions behind Nilsson's formulation to  
428 provide a multi-trial adaptive filter that is agnostic to the measurement and process noise and uses a  
429 simple least-squares reconstruction to recover time-varying structures of autoregressive coefficients  
430 from present and past signals.

431 To approximate unknown noise components directly from the data, several methods have been  
432 proposed. These include methods based on innovations and residuals (77–79), covariance matching  
433 techniques (80), Bayesian, maximum-likelihood and correlation-based approaches (73,81), and other  
434 strategies adopted for neuroimaging (37,47,82). However, in many cases the covariance matrices  
435 estimated with such approximation methods may act as containers for unknown modelling errors  
436 (73), which leads to erroneous models and inadequate solutions (76,78). To overcome these risks, we  
437 adapted Nilsson's approach, which retains a simple and flexible formulation of the filter that is  
438 applicable to the case of multi-trial recordings. An important caveat for a filter of this form, however,  
439 is that it is by definition suboptimal: while avoiding potentially inaccurate approximations of filter's  
440 components, overfitting and the inclusion of noise in the estimates becomes very likely.

441 In order to prevent overfitting, we introduced a regularization based on singular value  
442 smoothing (83). Singular value smoothing, or damped SVD (84) retains information up to a given  
443 proportion of explained variance, reducing the effect of singular values below a given threshold (the  
444 filtering factor, eq. 20). Theoretically, how much to retain depends on the SNR and on the partitioning  
445 of variance among the main components of the data under investigation. For instance, lowering the  
446 amount of explained variance may result in connectivity estimates that are driven by only a few  
447 components. Whether this is desirable or problematic depends upon the hypothesis under  
448 consideration, and on the component structure in the data. At the other extreme, regularization can be  
449 avoided for very low-dimensional problems (e.g., bivariate analysis) or very high signal-to-noise ratio  
450 datasets. Following previous work, we set the filtering factor to retain 99% of the explained variance  
451 (85–88), and found that this threshold yields high and reliable performance for surrogate data of  
452 variable SNR, and for two sets of real EEG recordings.

453 As a least-squares regularization, the SVD smoothing also promotes sparse solutions by  
454 shrinking tvMVAR coefficients of irrelevant and redundant components toward zero. This feature  
455 helps to overcome the curse of dimensionality by favoring sparser connectivity patterns. Moreover,  
456 in real functional brain networks sparsity is expected because of the sparse topology of underlying  
457 structural links (89,90). Promoting a certain degree of sparseness in functional networks has been the

458 objective of several recent works combining Granger causality and MVAR modelling with  
459 regularization procedures (e.g.,  $\ell_1$  or  $\ell_2$  norm) (51,90–92). Moreover, adding group-LASSO penalties  
460 has been shown to improve the Kalman filter’s sensitivity and the robustness of the estimates (93). In  
461 contrast, STOK encourages sparse solutions by using a well-established technique for regularizing  
462 least-squares problems (SVD smoothing). The simplicity and flexibility of the least-squares  
463 reconstruction has the additional advantage that it becomes straightforward to implement other  
464 families of sparsity constraints, and to combine multiple constraints for the same estimate (90).  
465 Comparing the SVD smoothing with alternative penalizations is an interesting direction for future  
466 work.

467         The third methodological innovation of the STOK filter is a self-tuning memory decay that  
468 automatically calibrates adaptation speed at each timepoint. The adaptation parameter is a critical  
469 factor in adaptive filtering that determines the trade-off between the filter’s speed and the smoothness  
470 of the estimates (38,47). Methods that use a fixed adaptation constant assume that the system under  
471 investigation has a constant memory decay. But this assumption is unlikely to hold for neural systems  
472 that show non-stationary dynamics and sequential states of variable duration (6,34,74,94). To allow  
473 flexible tracking speed, adaptive filters with variable forgetting factors have been previously  
474 introduced, but these always require additional parameters that need to be chosen a priori, for instance  
475 to regulate the window length in which the forgetting factor is updated (75,95,96). Here we developed  
476 a new solution to determine the memory of the system in a completely data-driven fashion, by  
477 updating the filter’s speed using a window length of the model order  $p$ . At each time step, the residuals  
478 from independent past models of length  $p$  are used to derive a recursive update of the filter, through  
479 the automatic regulation of an exponential running average factor  $c$ . By combining the self-tuning  
480 memory decay with SVD regularization, the filter can run at maximum speed without the risk of  
481 introducing noisy fluctuations in the estimates, a problem that we observed for the classical Kalman  
482 filter in both surrogate and real data (Fig 1, Fig 4). Unlike other algorithms, therefore, the STOK filter  
483 can accurately track phasic and rapid changes in connectivity patterns, such as those that may underlie  
484 sequential evoked components during tasks and event-related designs.

485         The temporal evolution of the memory parameter  $c$  can potentially be used to indicate the  
486 presence of state transitions and stable states. When the model used to predict past segments of data  
487 is no longer a good model for incoming data, the memory of the filter decreases and the algorithm  
488 learns more from new data than from previous predictions, indicating a potential state transition.  
489 Conversely, when past models keep predicting new data with comparable residuals, the filter presents  
490 longer memory and slower updates, suggesting a stable state. In this way, the temporal evolution of  
491 the memory decay provides information about time constants and transition points in the multivariate

492 process under investigation, an additional indicator that can be used to quantify the temporal evolution  
493 of neural systems (4,16,94). Measures of state stability and changes, for instance, have been  
494 previously used in topographic EEG analysis (25,97), and we expect these be related to temporal  
495 variations in system memory.

496 In its current form, the STOK filter is a multi-trial algorithm, leveraging regularities and  
497 correlations across trials under the assumption that multiple trials are coherent, temporally aligned  
498 realizations of the same process (38,98). In principle, however, the algorithm can be adapted for real-  
499 time tracking and single-trial modelling, provided that the least-squares reconstruction at its core is  
500 not ill-conditioned. This can be achieved, for instance, by adding more of the past measurements to  
501 the observation equation (e.g., eq. [4] in Nilsson, 2006). Future work will address the suitability of  
502 the STOK for single-trial and real-time tracking with dedicated tests.

503 As a note of caution, STOK can be used to derive directed functional connectivity measures  
504 within the Granger causality framework which has well-known strengths and limitations (99–101).  
505 As such, it estimates linear temporal dependencies and statistical relationships among multiple signals  
506 in a data-driven way, without a guaranteed mapping onto the underlying neuronal circuitry (26,102–  
507 104). However, STOK provides a novel formulation that is well-suited for incorporating model-based  
508 or physiologically-derived information that could favor more biophysically plausible interpretations.  
509 Structural connectivity matrices, for instance, or models of cortical layers' communication, can be  
510 easily incorporated as priors for constraining the least-squares solution (105,106), thus allowing the  
511 estimation of dynamic functional connectivity on the backbone of a detailed biophysical model.

512 As evident from our tests on real stimulus-evoked EEG data, the STOK filter can recover key  
513 patterns of dynamic functional connectivity with high temporal and frequency resolution. This  
514 positions STOK to provide new insights into the fast dynamics of neural interactions that were  
515 previously unattainable due to methodological limitations. In the rat EEG data, for instance, STOK  
516 results indicated that gamma-band activity flows mainly from contralateral somatosensory cortex to  
517 neighboring regions in a restricted temporal window around the peak of evoked activity, followed by  
518 a global decrease of interactions that may underlie local post-excitatory inhibition and global  
519 desynchronization in the gamma range (107,108). Before whisker stimulation, gamma-band  
520 influences from somatosensory cortex already showed increased functional connectivity with  
521 anterior, but not posterior, regions. Such detailed and temporally well-defined patterns of functional  
522 connections provide new valuable information for models of somatosensory processing in rats.  
523 Likewise, our results with human EEG recordings clearly indicated two critical windows of network  
524 interactions in the gamma range that emerged at plausible latencies of motion processing (64–66).  
525 These interactions involved increased outflow from temporal-occipital regions, including MT+, and

526 from the human homologue of the frontal eye field, providing a clear view on the network  
527 organization of motion processing.

528 While STOK was designed for connectivity analysis, it implements a tvMVAR model that  
529 can also be used for time-varying power spectrum density estimation. Our results in human EEG  
530 suggest that the PSD estimated by STOK has better time and frequency resolution than wavelet  
531 decomposition. Previous work has shown that a window-based MVAR approach can outperform  
532 multi-taper approach for time varying PSD estimates (109). The choice of model order is often  
533 considered a drawback of parametric approaches (98), but our result show that STOK is less affected  
534 by the choice of the model order, and does not require setting a window size. As such, STOK is also  
535 a promising tool for PSD analysis. Its ability to track fast temporal dynamics while maintaining high  
536 frequency specificity provide an advantage over non-parametric approaches that are subject to the  
537 trade-off between temporal and frequency resolution (68).

538 To conclude, the STOK filter is a new tool for tvMVAR modeling non-stationary data with  
539 unknown noise components. It accurately characterizes event-related states, rapid network  
540 reconfigurations and frequency-specific dynamics at the sub-second timescale. STOK provides a  
541 powerful new tool in the quest of understanding fast functional network dynamics during sensory,  
542 motor and cognitive tasks (13,110,111), and can be widely applied in a variety of fields, such as  
543 systems-, network- and cognitive neuroscience.

544

## 545 **Methods**

### 546 *Time-varying multivariate autoregressive modelling under the general linear Kalman Filter*

547 Physiological time-series with multiple trials can be considered as a collection of realizations of the  
548 same multivariate stochastic process  $Y_t$ :

$$549 \quad Y_t = \begin{bmatrix} y_{1,t}^{(1)} & \cdots & y_{d,t}^{(1)} \\ \vdots & \ddots & \vdots \\ y_{1,t}^{(N)} & \cdots & y_{d,t}^{(N)} \end{bmatrix} \quad t = t_1, \dots, t_T$$

550 [1]

551 where  $t$  refers to time,  $T$  is the length of the time-series,  $N$  the total number of trials and  $d$  the  
552 dimension of the process (e.g., number of channels/electrodes). The dynamic behavior of  $Y$  over time  
553 can be adequately described by a tvMVAR model of the general form:

$$554 \quad Y_t = \sum_{k=1}^p A_{k,t} Y_{t-k} + \varepsilon_t$$

555 [2]

Running head: THE STOK FILTER FOR TIME-VARYING CONNECTIVITY

556 where  $A_{k,t}$  are  $[d \times d]$  matrices containing the model coefficients (AR matrices),  $\varepsilon_t$  is the zero-mean  
557 white noise with covariance matrix  $\Sigma_\varepsilon$  (also called the *innovation* process), and  $p$  is the model order.

558 An efficient approach to derive the AR coefficients and the innovation covariance  $\Sigma_\varepsilon$  in eq.  
559 [2] is the use of state-space models (Arnold, Milner, Witte, Bauer, & Braun, 1998; Gelb, 1974; Milde  
560 et al., 2010). State-space models apply to problems with multivariate dynamic linear systems of both  
561 stationary and non-stationary stochastic variables (112) and can be used to reconstruct the set of  
562 linearly independent hidden variables that regulate the evolution of the system over time (26). The  
563 general linear Kalman filter (KF) (36,38) is an estimator of a system state and covariance that has the  
564 following state-space representation:

565

566

$$x_t = \Phi_{t-1}x_{t-1} + \omega_{t-1}$$

567

[3]

568

$$z_t = H_t x_t + v_t$$

569

[4]

570 Equations [3] and [4] are called the state or system equation and the observation or measurement  
571 equation, respectively. In eq. [3], the hidden state  $x$  at time  $t$  has a deterministic component given by  
572 the propagation of the previous state  $x_{t-1}$  through a transition matrix  $\Phi$ , and a stochastic component  
573 given by the zero-mean white noise sequence  $\omega$  of covariance  $Q_t$ . In eq. [4], the observed data  $z$  at  
574 time  $t$  are expressed as a linear combination of the state variable  $x$  with projection measurement  
575 matrix  $H$ , in the absence of noise. The term  $v_t$  is a random white noise perturbation (zero mean,  
576 covariance  $R_t$ ) corrupting the measurements.

577 To recursively estimate the hidden state  $x$  at each time ( $t = t_1, \dots, t_T$ ), the Kalman filter  
578 alternates between two steps, the prediction and the update step. In the prediction step, the state and  
579 the error covariance are extrapolated as:

580

$$\hat{x}_t^{(-)} = \Phi_{t-1} \hat{x}_{t-1}^{(+)}$$

581

[5]

582

$$P_t^{(-)} = \Phi_{t-1} P_{t-1}^{(+)} \Phi_{t-1}^T + Q_{t-1}$$

583

[6]

584 where  $\hat{x}_t^{(-)}$  and  $P_t^{(-)}$  are the *a priori* or predicted state and the error covariance at time  $t$ , based on  
585 the propagation of the previous estimated state and covariance  $\hat{x}_{t-1}^{(+)}$  and  $P_{t-1}^{(+)}$  through the transition  
586 matrix  $\Phi$ . The superscript  $T$  denotes matrix transposition. Note that eq. [6] contains an explicit term  
587 for the process noise covariance matrix  $Q$ .



Running head: THE STOK FILTER FOR TIME-VARYING CONNECTIVITY

588 In the update step, a posteriori estimates of the state and error covariance are refined according  
 589 to:

$$590 \quad K_t = P^{(-)} H_t^T (H_t P^{(-)} H_t^T + R_t)^{-1} \quad [7]$$

$$592 \quad \hat{x}_t^{(+)} = \hat{x}_t^{(-)} + K_t (z_t - H_t \hat{x}_t^{(-)}) \quad [8]$$

$$594 \quad P_t^{(+)} = (I - K_t H_t) P_t^{(-)} \quad [9]$$

596 where  $I$  is the identity matrix, and  $K_t$  is the Kalman Gain matrix reflecting the relationship between  
 597 uncertainty in the prior estimate and uncertainty in the measurements (in more simple form,  $k =$   
 598  $\frac{\sigma^2_{estimate}}{\sigma^2_{estimate} + \sigma^2_{measurement}}$ , with  $\sigma^2 = \text{variance}$ ). The Kalman Gain thus quantifies the relative reliability of  
 599 measurements and predictions and determines which one should be given more weight during the  
 600 update step: if measurements are reliable, the measurement noise covariance  $R_t$  is smaller and  $K_t$   
 601 from eq. [7] will be larger; if measurements are noisy (larger  $R_t$ ),  $K_t$  will be smaller. The effect of  $K_t$   
 602 on the updated a posteriori state estimate  $\hat{x}_t^{(+)}$  is evident from eq. [8], where the updated state at time  
 603  $t$  is a linear combination of the *a priori* state  $\hat{x}_t^{(-)}$  and a weighted difference between the current  
 604 measurements  $z_t$  and the predicted measurement based on  $\hat{x}_t^{(-)}$  (e.g., the residuals or measurement  
 605 innovation term  $(z_t - H_t \hat{x}_t^{(-)})$  on the right-hand side of eq. [8]). Thus, when the Kalman Gain  
 606 increases following reliable measurements, the contribution of the measurement innovation will  
 607 increase as well, and the a posteriori estimate  $\hat{x}_t^{(+)}$  will contain more from actual measurements and  
 608 less from previous predictions. Conversely, when the Kalman Gain decreases following noisy  
 609 measurements, the a posteriori estimate  $\hat{x}_t^{(+)}$  will be closer to the *a priori* predicted state  $\hat{x}_t^{(-)}$ . It is  
 610 important to note that the Kalman Gain minimizes the trace of the prediction error covariance  $P^{(+)}$   
 611 (35) and depends on the *innovation covariance* term  $(H_t P^{(-)} H_t^T + R_t)^{-1}$  in eq. [7], which includes  
 612 explicitly the measurement noise  $R$  and the process noise covariance  $Q$  from eq. [6]. When both  $w$   
 613 and  $v$  are Gaussian with  $w \sim N(0, R)$ ,  $v \sim N(0, Q)$  and  $E[w_t v_t^T] = 0$ , and the design and noise matrices  
 614  $H$ ,  $\Phi$ ,  $R$ , and  $Q$  are known, the state-space Kalman filter is the optimal linear adaptive filter (35).

615 In the context of physiological time-series, however, the optimal behavior of the Kalman filter  
 616 is not assured and the algorithm requires some specific accommodations to account for: 1) the lack  
 617 of known transition matrix  $\Phi$  and measurement matrix  $H$ , and 2) the unknown covariance matrices  
 618  $R$ , and  $Q$ . To accommodate 1), the transition matrix  $\Phi$  is usually replaced by an identity matrix  $I$

Running head: THE STOK FILTER FOR TIME-VARYING CONNECTIVITY

619 (37,38), which propagates the state  $x$  from time  $t - 1$  to  $t$ , such that the state in equation [3] follows  
 620 a first order random walk model (113):

$$621 \quad x_t = x_{t-1} + \omega_{t-1}. \quad [10]$$

623 The objective of the filter is to reconstruct the hidden tvMVAR process generating the observed  
 624 physiological signals for each time  $t$ , which implies the following links between the state-space  
 625 representation in eq. [3-4] and the tvMVAR model in eq. [1-2]:

$$626 \quad x_t = \begin{bmatrix} A_{1,t}^{(1)} \\ \vdots \\ A_{p,t}^{(N)} \end{bmatrix}, z_t = Y_t \quad [11]$$

628 where  $x_t$  has dimensions  $[d * p \times p]$  and  $z [N \times d]$  contains the measured signals at the current time  $t$ .

629 To establish the connection with the tvMVAR model, the measurement projection matrix  $H$  is  
 630 redefined as:

$$631 \quad H_t = (Y_{t-1}, \dots, Y_{t-p}) \quad [12]$$

633 such that measurement equation [4] now expresses the observed data as a linear combination of the  
 634 state  $x_t$  and past measurements  $H_t$  with additional perturbation  $v_t$ . This formulation suggests that the  
 635 hidden state  $x_t$  can be represented as a noise-contaminated least-squares reconstruction from present  
 636 and past measurements:

$$637 \quad x_t = H_t^{-1} z_t - v_t. \quad [13]$$

639 The second critical step in applying Kalman filtering to physiological data is the determination  
 640 of the filter covariance matrices  $R$ , and  $Q$ . A widely used approach is to derive  $R$  recursively from  
 641 measurement innovations and to approximate  $Q$  as a diagonal weight matrix that determines the rate  
 642 of change of  $P(\bar{t})$  (37,38,47,see also 114 for a list of alternative methods). With this approach,  $\hat{R}$  is  
 643 initialized as  $I [d \times d]$  and adaptively updated from the measurement innovations (the pre-update  
 644 residuals) as:

$$645 \quad \Sigma_r = \frac{(z_t - H_t \hat{x}_t^{(-)})^T (z_t - H_t \hat{x}_t^{(-)})}{N - 1}, \hat{R}_t = \hat{R}_{t-1} + c(\Sigma_r - \hat{R}_{t-1}) \quad [14]$$

Running head: THE STOK FILTER FOR TIME-VARYING CONNECTIVITY

647 where  $\Sigma_r$  is the covariance of measurement innovations,  $N$  is the total number of trials and  $c$   
648 ( $0 \leq c \leq 1$ ) is a constant across time that regulates the adaptation speed for  $\hat{R}_t$  (38).  $\hat{R}_t$  is computed  
649 before the Kalman update to replace the unknown  $R_t$  in the Kalman Gain with

$$650 \quad K_t = P_t^{(-)} H_t^T (H_t P_t^{(-)} H_t^T + \text{tr}(\hat{R}_t) I_N)^{-1} \quad [15]$$

651  
652 where  $\text{tr}$  denotes the trace of a matrix and  $I_O$  is the identity matrix [ $N \times N$ ]. The other unknown  
653 process noise covariance  $Q$ , is replaced by a rate of change matrix  $C^2 I_{[d \times p]}$  added to the diagonal of  
654  $P_t^{(-)}$  in eq. [6] (115). The two constants  $c$  and  $C$  are usually selected as identical and determined *a*  
655 *priori* (Ghumare, Schrooten, Vandenberghe, & Dupont, 2018; Ghumare, Schrooten, Vandenberghe,  
656 & Dupont, 2015; Leistriz et al., 2013) or through cost functions that minimize residual errors  
657 (37,118,69). In what follows we assume  $c$  and  $C$  to be identical and denote them as adaptation constant  
658  $c$ .

659 The lack of a known transition matrix (eq. [5]) and the way that  $R$  and  $Q$  are approximated  
660 makes the adaptation constant  $c$  the critical free parameter that determines the trade-off between fast  
661 adaptation and smoothness: a small  $c$  value adds inertia to the system, reducing the ability to track  
662 and to recover from dynamic changes in the true state while a large  $c$  value increases the contribution  
663 of measurements to each update in eq. [7] and the uncertainty associated with  $P_t^{(-)}$ . Thus, setting  $c$   
664 too large yields highly variable estimates that fluctuates around the true state introducing disturbances  
665 to the estimated state, rather than filtering them out (119). Although there exists no objective criterion  
666 to determine the optimal  $c$  in real data (39), several optimization approaches are available  
667 (69,114,118), but they are not universal to all types of data (39). Choosing  $c$  *a priori* or based on  
668 previous findings is complicated by a further non-trivial aspect of the filter: the trace approximation  
669 of  $R$  in eq. [15] ( $\text{tr}(\hat{R}_t)$ ) implies that the system's dimensionality co-determines the uncertainty in  
670 measurements, the Kalman gain and the relative weight assigned to measurements. Thus, the effect  
671 of  $c$  on the update depends on the number of signals considered. Moreover,  $c$  is assumed stationary  
672 and constant for every time step  $t$ , but this assumption may not be warranted in the context of non-  
673 stationary neuronal time-series (74).

674 These critical aspects, along with the lack of an objective criterion for selecting  $c$ , increases  
675 the risk of erroneous models and suboptimal filtering of physiological data which complicates the  
676 validity of inferences and the generalization of findings.

677

678 *The STOK: Self-Tuning Optimized Kalman filter*

679 The critical role of the adaptation constant  $c$  when both  $R$  and  $Q$  are unknown motivated us to develop  
 680 a new adaptive filter that presents the following properties: 1) It does not require any explicit  
 681 knowledge of  $R$  and  $Q$  (73,120); 2) It embeds a self-tuning factor that auto-calibrates the adaptation  
 682 speed at each time step. Property 1) is achieved by extending the solution for Kalman filtering with  
 683 unknown noise covariances proposed in Nilsson (2006) to the case of multi-trial time-series.  
 684 According to Nilsson (2006), a reasonable tracking speed avoiding noise fluctuations can be achieved  
 685 assuming the following relationship:

686

$$687 \quad HPH^T \approx cR$$

688 [16]

689 that is, the error covariance matrix  $P$ , projected onto the measurement space, is a scaled version of  
 690 the measurement noise covariance matrix  $R$ , with  $c$  a scalar positive tuning factor (see 73 for a  
 691 complete derivation). Assumption [16] allows a new formulation of the Kalman gain in eq. [7] as:

692

$$693 \quad K_t = P_t^{(-)} H_t^T (H_t P_t^{(-)} H_t^T + R_t)^{-1}$$

$$694 \quad = H_t^+ c R_t (c R_t + R_t)^{-1}$$

$$695 \quad = c H_t^+ (c + 1)^{-1} = \frac{c}{1 + c} H_t^+$$

696 [17]

697 where the apex  $+$  stands for the Moore-Penrose pseudoinverse. By substituting  $K_t$  from eq. [17] in  
 698 eq. [8], the new state update becomes:

699

$$700 \quad \hat{x}_t^{(+)} = \hat{x}_t^{(-)} + K_t (z_t - H_t \hat{x}_t^{(-)})$$

$$701 \quad = \hat{x}_t^{(-)} + \frac{c}{1 + c} H_t^+ (z_t - H_t \hat{x}_t^{(-)})$$

$$702 \quad = \frac{\hat{x}_t^{(-)} + c H_t^+ z_t}{1 + c}$$

703 [18]

704 in which the update of  $\hat{x}_t^{(+)}$  is a weighted average of past predictions  $\hat{x}_t^{(-)}$  and a least-squares  
 705 reconstruction from recent measurements  $H_t^+ z_t$ . When  $H_t$  is defined as in eq. [12],  $H_t^+ z_t$  is  
 equivalent to finding the set of MVAR coefficients at each time  $t$ , by least-squares regression of the  
 present signals  $z_t$  on the past signals  $H_t$ , with multiple trials as observations.

Running head: THE STOK FILTER FOR TIME-VARYING CONNECTIVITY

706 The link with a least-squares problem was already suggested in eq. [13], however, by  
 707 comparing eq. [13] with eq. [18], it is evident that the new state update does not incorporate any  
 708 component of measurement noise  $v_t$ . This implies that in the presence of noisy measurements, the  
 709 new filter might be susceptible to overfitting and sensitive to noise. To overcome this issue, we  
 710 introduced regularization, a widely-used strategy to reduce model complexity and to prevent  
 711 overfitting in the domain of least-squares problems (90,91,121). More precisely, we employed a  
 712 singular value decomposition (SVD)-based noise filtering with a standard form regularization  
 713 (121,122) and a data-driven determination of the tuning parameter. Consider  $\tilde{H}$ , the SVD of the  
 714  $N \times dp$  matrix  $H$ :

$$715 \quad \tilde{H} = USV^T \quad [19]$$

716 where  $U$  and  $V$  are orthonormal matrices and  $S$  is a  $N \times N$  diagonal matrix of singular values in  
 717 decreasing order. A regularized solution for the pseudoinverse  $H^+$  used in eq. [18] can be derived  
 718 from eq. [19] as

$$720 \quad \tilde{H}^+ = V\Gamma_r^+ U^T, \quad \Gamma_r^+ = \begin{bmatrix} S_{1,1}/S_{1,1}^2 + \lambda & \cdots & 0 \\ \vdots & \ddots & \vdots \\ 0 & \cdots & S_{N,N}/S_{N,N}^2 + \lambda \end{bmatrix} \quad [20]$$

721 in which the diagonal elements of  $\Gamma_r^+$  correspond to the diagonal of the inverse of  $S$ , subject to a  
 722 smoothing filter that dampens the components lower than a tuning factor  $\lambda$  (122). To determine  $\lambda$  in  
 723 a completely data-driven fashion and to avoid excessive regularization, we use a variance-based  
 724 criterion: At each time step,  $\lambda$  takes on the value that allows to retain components that together explain  
 725 at least 99% of the total variance in  $H_t$ . The 99% criterion is a canonical conservative threshold  
 726 recommended in dimensionality reduction and noise filtering of physiological time-series (85–88),  
 727 but the value of this threshold can in principle be tuned to the signal-to-noise ratio.

729 The second property that we introduced in the STOK filter is a self-tuning memory based on  
 730 the adaptive calibration of the tuning factor  $c$  in eq. [18]. The single constant  $c$  is a smoothing  
 731 parameter in the exponential smoothing of the state  $\hat{x}_t^{(+)}$  and determines the exponential decay of  
 732 weights assigned to past predicted states, as they get older —the fading memory of the system.  
 733 Whereas a fixed adaptation constant assumes a steady memory decay of the system, which could not  
 734 be appropriate in modelling neuronal processes and dynamics (74), solutions for variable fading  
 735 factors have been widely explored (see 123 for a comprehensive list), also in relation to intrinsic

736 dynamics of physiological signals (124). Here we propose a new method based on monitoring the  
 737 proportional change in innovation residuals from consecutive segments of time, according to:

$$738 \quad c_t = \min \left( b + \left[ \frac{|tr(\hat{\Sigma}_\varepsilon^{new}) - tr(\hat{\Sigma}_\varepsilon^{old})|}{tr(\hat{\Sigma}_\varepsilon^{old})} \right], 1 - b \right)$$

739 [21]

740 where  $b$  is a baseline constant ( $b = 0.05$ ) that prevents the filter to perform at excessively slow  
 741 tracking speed, such that  $c \in (0.05, 0.95)$ , and  $tr(\hat{\Sigma}_\varepsilon^{new/old})$  is the trace of the estimated  
 742 measurements innovation covariance for consecutive segments of data: *new* is a segment comprising  
 743 samples from  $t$  to  $t - p$ , and *old* is a segment from  $t - (p + 1)$  to  $t - 2p$ . The use of successive  
 744 residuals to adjust variable fading factors, as well as the choice of segments or averaging windows to  
 745 prevent spurious effects of instantaneous residuals, is common practice in adaptive filtering (75,125)  
 746 but requires the selection of an additional parameter that specify the windows length. Here we set  $p$   
 747 —the model order— as the segments' length and compare residuals from two consecutive non-  
 748 overlapping segments in order to adjust  $c$  at each time  $t$ . The rationale behind this strategy is to avoid  
 749 any additional parameter, considering the more order (i.e., the amount of past information chosen to  
 750 best predict the signals) as the optimal segment for extrapolating residuals. In addition, non-  
 751 overlapping segments are used to monitor changes in residuals from independent sets of data. In other  
 752 words, eq. [21] allows  $c$  to increase as the residuals generated by the model in predicting new data  
 753 increase with respect to an independent model from the immediate past: when the model is no longer  
 754 capable of explaining incoming data, tracking speed increases and the memory of the system shortens.

755

### 756 Partial Directed Coherence (PDC)

757 To compare STOK and KF using a time-frequency representation of directed connectivity, we  
 758 computed the squared row-normalized Partial Directed Coherence (41,PDC; 126). PDC quantifies  
 759 the direct influence from time-series  $j$  to time-series  $l$ , after discounting the effect of all the other  
 760 time-series. In its squared and row-normalized definition, PDC from  $j$  to  $l$  is a function of  $A_{lj}$ , obtained  
 761 as:

$$762 \quad \bar{\pi}_{lj}(f,t) = \frac{|\bar{A}_{lj}(f,t)|^2}{\sum_{m=1}^d |\bar{A}_{lm}(f,t)|^2}$$

763 [22]

764 where  $\bar{A}(f,t)$  is the frequency representation of the  $A$  coefficients at time  $t$ , after the Z-transform:



765 
$$\bar{A}(f,t) = \sum_{k=1}^p A_{k,t} z^{-k}, \quad z = e^{-i2\pi f}$$

766 [23]

767 with  $i$  as the imaginary unit. The square exponents in eq. [22] enhance the accuracy and stability of  
768 the estimates (126) while the denominator allows the normalization of outgoing connections by the  
769 inflows (56).

770 The parametric time-varying power spectral density of each time-series (PSD) can be  
771 estimated using the prediction error covariance matrix  $\hat{\Sigma}_\varepsilon$  and the complex matrix in eq. [23], as:

772 
$$PSD = B(f,t) \hat{\Sigma}_\varepsilon B(f,t)^*$$

773 [24]

774 where  $B(f,t)$  is the transfer function equal to the inverse of  $\bar{A}(f,t)$ , and  $*$  is the complex conjugate  
775 transpose. Since  $\Sigma_\varepsilon$  is time invariant by definition,  $\hat{\Sigma}_\varepsilon$  was estimated in both the KF and the STOK as  
776 the median measurements' innovation covariance (e.g.,  $\hat{R}_t$  in KF) across the last half of samples, in  
777 order to remove the effect of the initial filters' adaptation stage.

778

### 779 *Simulation framework*

780 To systematically compare the STOK and KF performance against known ground truth, we developed  
781 a new Monte Carlo simulation framework that approximates properties of realistic brain networks,  
782 extending beyond classical approaches with restricted number of nodes and fixed connectivity  
783 patterns (28). Signals were simulated according to a reduced AR(6) process in which coefficients of  
784 a AR(2) model were placed in the first two lags for diagonal elements, and at variable delays (up to  
785 5 samples) for off-diagonal elements (127). Surrogate networks were created assuming existing  
786 physical links among 60-80% of all possible connections (128) and directed functional interactions  
787 were placed in a subset of existing links (50%) with variable time-frequency dynamics. Dominant  
788 oscillatory components in the low frequency range (e.g., 1-25 Hz) were generated by imposing  
789 positives values in the diagonal AR(2) coefficients of the simulated tvMVAR matrix (129).  
790 Interactions at multiple frequencies were generated by randomly assigning both positive and negative  
791 values to the AR(2) coefficients outside the diagonal. The magnitude of AR coefficients was  
792 randomly determined (range: 0.1-0.5, in steps of 0.01) and off-diagonal coefficients were scaled by  
793 half magnitude. This range and scaling were chosen to match patterns observed in human EEG data.

794 To mimic dynamic changes in connectivity patterns, the structure and magnitude of off-  
795 diagonal AR coefficients varied across time, visiting three different regimes of randomly determined  
796 onset and transition times and with the only constrain to remain constant for at least 150 ms,

Running head: THE STOK FILTER FOR TIME-VARYING CONNECTIVITY

797 approximating the duration of quasi-stationary and metastable functional brain states (6,130). For  
798 each simulated regimen, the stochastic generation of AR coefficients was reiterated until the system  
799 reached asymptotic stability, i.e., satisfying the condition of real eigenvalues lower than zero.

800 Time-series for multiple trials ( $F_s = 200$  Hz; duration = 2 s) were obtained by feeding the  
801 same tvMVAR process with generative zero-mean white noise of variance 1, and imposing a small  
802 degree of correlation ( $r = 0.1 \pm 0.07$ ) in the generative noise across trials, reflecting the assumption  
803 that trials are realizations of the same process (38) and in line with the correlation among trials  
804 observed in the human EEG dataset. Except when specific parameters were varied, all simulations  
805 were done with 10 nodes, 200 trials and no additive noise. When additive noise was included in the  
806 simulation, the signal-to-noise ratio (SNR) was determined as the ratio between the squared amplitude  
807 of the signal and the squared amplitude of the additive noise.

808 To compare STOK and KF performance, we used the Receiving Operating Characteristic  
809 method (ROC) (40). For each simulated network, we first obtained a target ground truth by calculating  
810 PDC values directly from the simulated tvMVAR matrices, for frequencies between 1 and 100 Hz.  
811 Separate PDC matrices were then computed from the AR coefficients estimated with the STOK and  
812 KF filters. The ground truth PDC values were binarized using a range of thresholds criteria (e.g., PDC  
813  $> 0$ ; or PDC  $> 0.5$  quantile, see Fig. 2A), defining zeros as signal absent and ones as signal present.  
814 Similarly, the estimated PDC values were binarized using a range of criteria at which connections  
815 were considered present or absent. The range of criteria consisted of twenty equally-spaced quantiles  
816 (from the 1<sup>st</sup> to the 99<sup>th</sup> quantile) from the distribution of each estimated PDC. Sensitivity and  
817 specificity indexes were then computed for each criterion against the ground truth PDC and used to  
818 derive the ROC curve. Finally, overall performance was quantified by the area under the ROC curve  
819 (AUC, see Fig. 2A). This method has the advantage of being independent of the range of values in  
820 each estimated PDC and does not require any parametric or bootstrap procedure to determine  
821 statistically significant connections.

822 For each condition tested (see Results), we ran 30 realizations with different combination of  
823 parameters and the resulting AUC values were used in Analysis of Variance (ANOVA) and t-test  
824 statistical analysis.

825

### 826 Benchmark rat EEG

827 These EEG data were previously recorded from a grid of 16 stainless steel electrodes placed directly  
828 on the skull bone of 10 young Wistar rats (P21; half males) during unilateral whisker stimulations  
829 under light isoflurane anesthesia (Fig. 3A-B). All animal handling procedures were approved by the

830 Office Vétérinaire Cantonal (Geneva, Switzerland) in accordance with Swiss Federal Laws. Data  
831 were originally acquired at 2000 Hz and bandpass filtered online between 1 and 500 Hz. Additional  
832 details about the recording can be found elsewhere (56,57). Data are freely available from  
833 <https://osf.io/fd5ru>.

834 The STOK filter and KF were applied to the entire network of 16 channels and used to derive  
835 PDC estimates. PDC results from the left and right stimulation were then combined within animals  
836 and only contralateral electrodes were further analyzed (56).

837

### 838 *Human EEG*

839 These human EEG data were taken from an ongoing project aimed at investigating the connectivity  
840 patterns of functionally specialized areas during perceptual processing. Data were recorded at 2048  
841 Hz with a 128-channel Biosemi Active Two EEG system (Biosemi, Amsterdam, The Netherlands)  
842 while nineteen participants (3 males, mean age =  $23 \pm 3.5$ ) performed a coherent motion detection  
843 task in a dimly lit and electrically shielded room. Each trial started with a blank interval of 500 ms  
844 followed by a central dot kinematogram lasting 300 ms (dot field size =  $8^\circ$ ; mean dot luminance =  
845 50%). In half of the trials, 80% of the dots were moving toward either the left or right, with the  
846 remaining 20% moving randomly. In the other half of trials, all dots were moving randomly.  
847 Participants had to report the presence of coherent motion by pressing one of two buttons of a  
848 response box (Fig. 4A). After the participant's response, there was a random interval (from 600 to  
849 900 ms) before the beginning of a new trial. There were four blocks of 150 trials each, for a total of  
850 600 trials, (300 with coherent motion). Trials with coherent and random motion were interleaved  
851 randomly. Stimuli were generated using Psychopy (131) and presented on a VIEWPixx/3D display  
852 system ( $1920 \times 1080$  pixels, refresh rate of 100 Hz). All participants provided written informed  
853 consent before the experiment and had normal or corrected-to-normal vision. The experiment was  
854 approved by the local ethical committee.

855 EEG data were downsampled to 250 Hz (anti-aliasing filter: cut-off frequency = 112.5 Hz;  
856 transition bandwidth = 50 Hz) and detrended to remove slow fluctuations ( $<1$  Hz) and linear trends  
857 (132). The power line noise (50 Hz) was removed using the method of spectrum interpolation (133).  
858 EEG epochs were then extracted from the continuous dataset and time-locked from -1500 to 1000 ms  
859 relative to stimulus onset. Noisy channels were identified before pre-processing and removed from  
860 the dataset (average proportion of channels removed across participants:  $0.14 \pm 0.06$ ). Individual  
861 epochs containing non-stereotyped artifacts, peristimulus eye blinks and eye movements (occurring  
862 within  $\pm 500$  ms from stimulus onset) were also identified by visual inspection and removed from  
863 further analysis (mean proportion of epochs removed across participants:  $0.03 \pm 0.03$ ). Data were

864 cleaned from remaining physiological artifacts (eye blinks, horizontal and vertical eye movements,  
865 muscle potentials) using a ICA decomposition (FastIca, eeglab; ,134). Bad ICA components were  
866 labelled by crossing the results of a machine-learning algorithm (MARA, Multiple Artifact Rejection  
867 Algorithm in eeglab) with the criterion of >90% of total variance explained. ICA selection and  
868 removal of the labelled components was performed manually (mean proportion of components  
869 removed:  $0.07 \pm 0.03$ ). As a final pre-processing step, the excluded bad channels were interpolated  
870 using the nearest-neighbor spline method, data were re-referenced to the average reference and a  
871 global z-score transformation was applied to the entire dataset of each participant.

872 The LAURA algorithm implemented in Cartool (135) was used to compute the source  
873 reconstruction from available individual magnetic resonance imaging (MRI) data, applying the local  
874 spherical model with anatomical constraints (LSMAC) that constrains the solution space to the gray  
875 matter (135). A parcellation of the cortex into 83 sub-regions was then obtained using the  
876 Connectome Mapper open-source pipeline (136) and the Desikan-Killiany anatomical atlas (137).  
877 Source activity was then extracted from 16 bilateral motion-related regions of interest (ROI) defined  
878 from the literature (138,139). The ROIs were the pericalcarine cortex (V1), superior frontal sulcus  
879 (FEF), inferior parietal sulcus (IPS), cuneus (V3a), lateral occipital cortex (LOC), inferior medial  
880 occipital lobe (IOL), fusiform gyrus (FUS) and middle-temporal gyrus (MT+). Representative time-  
881 series for each ROI were obtained with the method of singular values decomposition (140). Time-  
882 series were then orthogonalized to reduce spatial leakage effects using the innovation  
883 orthogonalization method (141) and estimating the mixing matrix from the residuals of a stationary  
884 MVAR model applied to a baseline pre-stimulus interval (from -200 to 0 ms). The optimal model  
885 order for each participant was also estimated from the stationary pre-stimulus MVAR model using  
886 the Akaike final prediction error criterion (142) (optimal  $p = 11.9 \pm 1.2$ ). The optimal  $c$  for KF was  
887 estimated using the Relative Error Variance criterion (69,118) (optimal  $c = 0.0127$ ).

888 For the present work, we focused on EEG data in response to coherent motion only and we  
889 averaged the connectivity results from the left and right hemifield.

## 890 **Acknowledgements**

891 This study was supported by the Swiss National Science Foundation grants to GP (PZ00P3\_131731,  
892 PP00P1\_157420, and CRSII5-170873) and to MR (CRSII5-170873). We thank Mattia F. Pagnotta  
893 for helpful discussions and Joan Rué Queralt for translating the code to Python.

894

895

896 **References**

- 897 1. Bressler SL. Large-scale cortical networks and cognition. *Brain Res Rev.* 1995;20(3):288–304.
- 898 2. Fries P. Rhythms for cognition: communication through coherence. *Neuron.* 2015;88(1):220–  
899 235.
- 900 3. Varela F, Lachaux JP, Rodriguez E, Martinerie J. The brainweb: phase synchronization and  
901 large-scale integration. *Nat Rev Neurosci.* aprile 2001;2(4):229–39.
- 902 4. Vidaurre D, Quinn AJ, Baker AP, Dupret D, Tejero-Cantero A, Woolrich MW. Spectrally  
903 resolved fast transient brain states in electrophysiological data. *Neuroimage.* 2016;126:81–95.
- 904 5. Britz J, Van De Ville D, Michel CM. BOLD correlates of EEG topography reveal rapid resting-  
905 state network dynamics. *NeuroImage.* 1 ottobre 2010;52(4):1162–70.
- 906 6. Koenig T, Prichep L, Lehmann D, Sosa PV, Braeker E, Kleinlogel H, et al. Millisecond by  
907 millisecond, year by year: normative EEG microstates and developmental stages. *Neuroimage.*  
908 2002;16(1):41–48.
- 909 7. Lehmann D. Brain electric microstates and cognition: the atoms of thought. In: *Machinery of*  
910 *the Mind.* Springer; 1990. pag. 209–224.
- 911 8. Bressler SL, Coppola R, Nakamura R. Episodic multiregional cortical coherence at multiple  
912 frequencies during visual task performance. *Nature.* 11 novembre 1993;366(6451):153–6.
- 913 9. Ledberg A, Bressler SL, Ding M, Coppola R, Nakamura R. Large-Scale Visuomotor  
914 Integration in the Cerebral Cortex. *Cereb Cortex.* 1 gennaio 2007;17(1):44–62.
- 915 10. Martin AB, Yang X, Saalman YB, Wang L, Shestyuk A, Lin JJ, et al. Temporal Dynamics  
916 and Response Modulation across the Human Visual System in a Spatial Attention Task: An  
917 ECoG Study. *J Neurosci.* 9 gennaio 2019;39(2):333–52.
- 918 11. Michalareas G, Vezoli J, van Pelt S, Schoffelen J-M, Kennedy H, Fries P. Alpha-Beta and  
919 Gamma Rhythms Subserve Feedback and Feedforward Influences among Human Visual  
920 Cortical Areas. *Neuron.* 20 gennaio 2016;89(2):384–97.
- 921 12. Breakspear M. Dynamic models of large-scale brain activity. *Nat Neurosci.* marzo  
922 2017;20(3):340–52.
- 923 13. Bressler SL, Menon V. Large-scale brain networks in cognition: emerging methods and  
924 principles. *Trends Cogn Sci.* giugno 2010;14(6):277–90.
- 925 14. Hastie T, Tibshirani R, Friedman J. *The Elements of Statistical Learning: Data Mining,*  
926 *Inference, and Prediction.* Biometrics [Internet]. 2002; Available at:  
927 <http://web.stanford.edu/~hastie/pub.htm>
- 928 15. Khambhati AN, Sizemore AE, Betzel RF, Bassett DS. Modeling and interpreting mesoscale  
929 network dynamics. *NeuroImage.* 15 ottobre 2018;180:337–49.
- 930 16. O’Neill GC, Tewarie P, Vidaurre D, Liuzzi L, Woolrich MW, Brookes MJ. Dynamics of large-  
931 scale electrophysiological networks: A technical review. *NeuroImage.* 15 2018;180(Pt B):559–  
932 76.



Running head: THE STOK FILTER FOR TIME-VARYING CONNECTIVITY

- 933 17. Bastos AM, Schoffelen J-M. A tutorial review of functional connectivity analysis methods and  
934 their interpretational pitfalls. *Front Syst Neurosci*. 2016;9:175.
- 935 18. Dosenbach NU, Fair DA, Miezin FM, Cohen AL, Wenger KK, Dosenbach RA, et al. Distinct  
936 brain networks for adaptive and stable task control in humans. *Proc Natl Acad Sci*.  
937 2007;104(26):11073–11078.
- 938 19. Friston KJ. Functional and effective connectivity: a review. *Brain Connect*. 2011;1(1):13–36.
- 939 20. Michalareas G, Vezoli J, Van Pelt S, Schoffelen J-M, Kennedy H, Fries P. Alpha-beta and  
940 gamma rhythms subserve feedback and feedforward influences among human visual cortical  
941 areas. *Neuron*. 2016;89(2):384–397.
- 942 21. Buzsáki G, Anastassiou CA, Koch C. The origin of extracellular fields and currents — EEG,  
943 ECoG, LFP and spikes. *Nat Rev Neurosci*. 1 giugno 2012;13(6):407–20.
- 944 22. Einevoll GT, Kayser C, Logothetis NK, Panzeri S. Modelling and analysis of local field  
945 potentials for studying the function of cortical circuits. *Nat Rev Neurosci*. novembre  
946 2013;14(11):770–85.
- 947 23. Göbel W, Helmchen F. In Vivo Calcium Imaging of Neural Network Function. *Physiology*. 1  
948 dicembre 2007;22(6):358–65.
- 949 24. Lopes da Silva F. EEG and MEG: Relevance to Neuroscience. *Neuron*. 4 dicembre  
950 2013;80(5):1112–28.
- 951 25. Michel CM, Murray MM. Towards the utilization of EEG as a brain imaging tool. *NeuroImage*.  
952 1 giugno 2012;61(2):371–85.
- 953 26. He B, Astolfi L, Valdes-Sosa PA, Marinazzo D, Palva S, Benar CG, et al. Electrophysiological  
954 Brain Connectivity: Theory and Implementation. *IEEE Trans Biomed Eng*. 2019;
- 955 27. Ding M, Bressler SL, Yang W, Liang H. Short-window spectral analysis of cortical event-  
956 related potentials by adaptive multivariate autoregressive modeling: data preprocessing, model  
957 validation, and variability assessment. *Biol Cybern*. 2000;83(1):35–45.
- 958 28. Kaminski M, Szerling P, Blinowska K. Comparison of methods for estimation of time-varying  
959 transmission in multichannel data. In: *Information Technology and Applications in  
960 Biomedicine (ITAB), 2010 10th IEEE International Conference on*. IEEE; 2010. pag. 1–4.
- 961 29. Liang H, Ding M, Nakamura R, Bressler SL. Causal influences in primate cerebral cortex  
962 during visual pattern discrimination. *Neuroreport*. 11 settembre 2000;11(13):2875–80.
- 963 30. Kiebel SJ, Garrido MI, Moran RJ, Friston KJ. Dynamic causal modelling for EEG and MEG.  
964 *Cogn Neurodyn*. giugno 2008;2(2):121–36.
- 965 31. Quinn AJ, Vidaurre D, Abeyesuriya R, Becker R, Nobre AC, Woolrich MW. Task-Evoked  
966 Dynamic Network Analysis Through Hidden Markov Modeling. *Front Neurosci* [Internet]. 28  
967 agosto 2018 [citato 3 febbraio 2019];12. Available at:  
968 <https://www.frontiersin.org/article/10.3389/fnins.2018.00603/full>
- 969 32. Williams NJ, Daly I, Nasuto S. Markov Model-based method to analyse time-varying networks  
970 in EEG task-related data. *Front Comput Neurosci*. 2018;12:76.



Running head: THE STOK FILTER FOR TIME-VARYING CONNECTIVITY

- 971 33. Hutchison RM, Womelsdorf T, Allen EA, Bandettini PA, Calhoun VD, Corbetta M, et al.  
972 Dynamic functional connectivity: Promise, issues, and interpretations. *NeuroImage* [Internet].  
973 15 ottobre 2013 [citato 13 settembre 2019];80. Available at:  
974 <https://www.ncbi.nlm.nih.gov/pmc/articles/PMC3807588/>
- 975 34. Vidaurre D, Abeysuriya R, Becker R, Quinn AJ, Alfaro-Almagro F, Smith SM, et al.  
976 Discovering dynamic brain networks from big data in rest and task. *Neuroimage*.  
977 2018;180:646–656.
- 978 35. Gelb A. *Applied optimal estimation*. MIT press; 1974.
- 979 36. Kalman RE. A new approach to linear filtering and prediction problems. *J Basic Eng*.  
980 1960;82(1):35–45.
- 981 37. Arnold M, Milner XHR, Witte H, Bauer R, Braun C. Adaptive AR modeling of nonstationary  
982 time series by means of Kalman filtering. *IEEE Trans Biomed Eng*. 1998;45(5):553–562.
- 983 38. Milde T, Leistriz L, Astolfi L, Miltner WH, Weiss T, Babiloni F, et al. A new Kalman filter  
984 approach for the estimation of high-dimensional time-variant multivariate AR models and its  
985 application in analysis of laser-evoked brain potentials. *Neuroimage*. 2010;50(3):960–969.
- 986 39. Rubega M, Pascucci D, Queralt JR, Mierlo PV, Hagmann P, Plomp G, et al. Time-varying  
987 effective EEG source connectivity: the optimization of model parameters\*. In: 2019 41st  
988 Annual International Conference of the IEEE Engineering in Medicine and Biology Society  
989 (EMBC). 2019. pag. 6438–41.
- 990 40. Green DM, Swets JA. *Signal detection theory and psychophysics*. Vol. 1. Wiley New York;  
991 1966.
- 992 41. Baccalá LA, Sameshima K. Partial directed coherence: a new concept in neural structure  
993 determination. *Biol Cybern*. 2001;84(6):463–474.
- 994 42. Gohel B, Lee P, Kim M-Y, Kim K, Jeong Y. MEG Based Functional Connectivity: Application  
995 of ICA to Alleviate Signal Leakage. *IRBM*. giugno 2017;38(3):127–37.
- 996 43. Wens V, Marty B, Mary A, Bourguignon M, Op De Beeck M, Goldman S, et al. A geometric  
997 correction scheme for spatial leakage effects in MEG/EEG seed-based functional connectivity  
998 mapping. *Hum Brain Mapp*. 2015;36(11):4604–4621.
- 999 44. Anzolin A, Presti P, Van De Steen F, Astolfi L, Haufe S, Marinazzo D. Quantifying the Effect  
1000 of Demixing Approaches on Directed Connectivity Estimated Between Reconstructed EEG  
1001 Sources. *Brain Topogr*. 1 luglio 2019;32(4):655–74.
- 1002 45. Haufe S, Nikulin VV, Müller K-R, Nolte G. A critical assessment of connectivity measures for  
1003 EEG data: A simulation study. *NeuroImage*. 1 gennaio 2013;64:120–33.
- 1004 46. Leistriz L, Pester B, Doering A, Schiecke K, Babiloni F, Astolfi L, et al. Time-variant partial  
1005 directed coherence for analysing connectivity: a methodological study. *Philos Trans R Soc  
1006 Lond Math Phys Eng Sci*. 28 agosto 2013;371(1997):20110616.
- 1007 47. Toppi J, Babiloni F, Vecchiato G, Fallani FDV, Mattia D, Salinari S, et al. Towards the time  
1008 varying estimation of complex brain connectivity networks by means of a General Linear

Running head: THE STOK FILTER FOR TIME-VARYING CONNECTIVITY

- 1009 Kalman Filter approach. In: 2012 Annual International Conference of the IEEE Engineering in  
1010 Medicine and Biology Society. IEEE; 2012. pag. 6192–6195.
- 1011 48. Harrell FE, Lee KL, Mark DB. Multivariable prognostic models: issues in developing models,  
1012 evaluating assumptions and adequacy, and measuring and reducing errors. *Stat Med*.  
1013 1996;15(4):361–387.
- 1014 49. Harrell Jr FE. *Regression modeling strategies: with applications to linear models, logistic and*  
1015 *ordinal regression, and survival analysis*. Springer; 2015.
- 1016 50. Antonacci Y, Toppi J, Caschera S, Anzolin A, Mattia D, Astolfi L. Estimating brain  
1017 connectivity when few data points are available: Perspectives and limitations. In: 2017 39th  
1018 Annual International Conference of the IEEE Engineering in Medicine and Biology Society  
1019 (EMBC). 2017. pag. 4351–4.
- 1020 51. Antonacci Y, Toppi J, Mattia D, Pietrabissa A, Astolfi L. Single-trial Connectivity Estimation  
1021 through the Least Absolute Shrinkage and Selection Operator. In: 2019 41st Annual  
1022 International Conference of the IEEE Engineering in Medicine and Biology Society (EMBC).  
1023 2019. pag. 6422–5.
- 1024 52. Blinowska KJ. Review of the methods of determination of directed connectivity from  
1025 multichannel data. *Med Biol Eng Comput*. 2011;49(5):521–529.
- 1026 53. Bühlmann P, Van De Geer S. *Statistics for high-dimensional data: methods, theory and*  
1027 *applications*. Springer Science & Business Media; 2011.
- 1028 54. Pagnotta MF, Plomp G. Time-varying MVAR algorithms for directed connectivity analysis:  
1029 Critical comparison in simulations and benchmark EEG data. *PloS One*. 2018;13(6):e0198846.
- 1030 55. Pagnotta MF, Dhamala M, Plomp G. Benchmarking nonparametric Granger causality:  
1031 Robustness against downsampling and influence of spectral decomposition parameters.  
1032 *NeuroImage*. 2018;183:478–494.
- 1033 56. Plomp G, Quairiaux C, Michel CM, Astolfi L. The physiological plausibility of time-varying  
1034 Granger-causal modeling: normalization and weighting by spectral power. *NeuroImage*.  
1035 2014;97:206–216.
- 1036 57. Quairiaux C, Mégevand P, Kiss JZ, Michel CM. Functional development of large-scale  
1037 sensorimotor cortical networks in the brain. *J Neurosci*. 2011;31(26):9574–9584.
- 1038 58. Seth AK. A MATLAB toolbox for Granger causal connectivity analysis. *J Neurosci Methods*.  
1039 2010;186(2):262–273.
- 1040 59. Seth AK, Chorley P, Barnett LC. Granger causality analysis of fMRI BOLD signals is invariant  
1041 to hemodynamic convolution but not downsampling. *NeuroImage*. 15 gennaio 2013;65:540–  
1042 55.
- 1043 60. Ahlfors SP, Simpson GV, Dale AM, Belliveau JW, Liu AK, Korvenoja A, et al. Spatiotemporal  
1044 activity of a cortical network for processing visual motion revealed by MEG and fMRI. *J*  
1045 *Neurophysiol*. 1999;82(5):2545–2555.

Running head: THE STOK FILTER FOR TIME-VARYING CONNECTIVITY

- 1046 61. Bundo M, Kaneoke Y, Inao S, Yoshida J, Nakamura A, Kakigi R. Human visual motion areas  
1047 determined individually by magnetoencephalography and 3D magnetic resonance imaging.  
1048 *Hum Brain Mapp.* 2000;11(1):33–45.
- 1049 62. Aspell JE, Tanskanen T, Hurlbert AC. Neuromagnetic correlates of visual motion coherence.  
1050 *Eur J Neurosci.* 2005;22(11):2937–2945.
- 1051 63. Bekhti Y, Gramfort A, Zilber N, Van Wassenhove V. Decoding the categorization of visual  
1052 motion with magnetoencephalography. *BioRxiv.* 2017;103044.
- 1053 64. Müller MM, Junghöfer M, Elbert T, Rochstroh B. Visually induced gamma-band responses to  
1054 coherent and incoherent motion: a replication study. *NeuroReport.* 1997;8(11):2575–2579.
- 1055 65. Siegel M, Donner TH, Oostenveld R, Fries P, Engel AK. High-frequency activity in human  
1056 visual cortex is modulated by visual motion strength. *Cereb Cortex.* 2006;17(3):732–741.
- 1057 66. Swettenham JB, Muthukumaraswamy SD, Singh KD. Spectral properties of induced and  
1058 evoked gamma oscillations in human early visual cortex to moving and stationary stimuli. *J*  
1059 *Neurophysiol.* 2009;102(2):1241–1253.
- 1060 67. Pfurtscheller G, Neuper C, Mohl W. Event-related desynchronization (ERD) during visual  
1061 processing. *Int J Psychophysiol.* 1994;16(2–3):147–153.
- 1062 68. Morlet J, Arens G, Fourgeau E, Giard D. Wave propagation and sampling theory—Part II:  
1063 Sampling theory and complex waves. *GEOPHYSICS.* 1 febbraio 1982;47(2):222–36.
- 1064 69. Pascucci D, Hervais-Adelman A, Plomp G. Gating by induced  $\alpha$ - $\Gamma$  asynchrony in selective  
1065 attention. *Hum Brain Mapp.* 2018;39(10):3854–3870.
- 1066 70. Grandchamp R, Delorme A. Single-trial normalization for event-related spectral  
1067 decomposition reduces sensitivity to noisy trials. *Front Psychol.* 2011;2:236.
- 1068 71. Porcaro C, Zappasodi F, Rossini PM, Tecchio F. Choice of multivariate autoregressive model  
1069 order affecting real network functional connectivity estimate. *Clin Neurophysiol.* 1 febbraio  
1070 2009;120(2):436–48.
- 1071 72. Lozano-Soldevilla D, VanRullen R. The hidden spatial dimension of alpha: 10-Hz perceptual  
1072 echoes propagate as periodic traveling waves in the human brain. *Cell Rep.* 2019;26(2):374–  
1073 380.
- 1074 73. Nilsson M. Kalman filtering with unknown noise covariances. In: *Reglermöte 2006.* 2006.
- 1075 74. Ahmadipour P, Yang Y, Shanechi MM. Investigating the effect of forgetting factor on tracking  
1076 non-stationary neural dynamics. In: *2019 9th International IEEE/EMBS Conference on Neural*  
1077 *Engineering (NER).* 2019. pag. 291–4.
- 1078 75. Cho YS, Kim SB, Powers EJ. Time-varying spectral estimation using AR models with variable  
1079 forgetting factors. *IEEE Trans Signal Process.* 1991;39(6):1422–1426.
- 1080 76. Heffes H. The effect of erroneous models on the Kalman filter response. *IEEE Trans Autom*  
1081 *Control.* luglio 1966;11(3):541–3.

Running head: THE STOK FILTER FOR TIME-VARYING CONNECTIVITY

- 1082 77. Akhlaghi S, Zhou N, Huang Z. Adaptive adjustment of noise covariance in Kalman filter for  
1083 dynamic state estimation. In: 2017 IEEE Power & Energy Society General Meeting. IEEE;  
1084 2017. pag. 1–5.
- 1085 78. Poddar S, Kottath R, Kumar V, Kumar A. Adaptive sliding Kalman filter using nonparametric  
1086 change point detection. *Measurement*. 2016;82:410–420.
- 1087 79. Wang J. Stochastic Modeling for Real-Time Kinematic GPS/GLONASS Positioning.  
1088 *Navigation*. 1999;46(4):297–305.
- 1089 80. Almagbile A, Wang J, Ding W. Evaluating the performances of adaptive Kalman filter  
1090 methods in GPS/INS integration. *J Glob Position Syst*. 2010;9(1):33–40.
- 1091 81. Mehra R. Approaches to adaptive filtering. *IEEE Trans Autom Control*. 1972;17(5):693–698.
- 1092 82. Havlicek M, Jan J, Brazdil M, Calhoun VD. Dynamic Granger causality based on Kalman filter  
1093 for evaluation of functional network connectivity in fMRI data. *Neuroimage*. 2010;53(1):65–  
1094 77.
- 1095 83. Zheng S, Ding C, Nie F. Regularized Singular Value Decomposition and Application to  
1096 Recommender System. *ArXiv180405090 Cs Stat [Internet]*. 13 aprile 2018 [citato 8 luglio  
1097 2019]; Available at: <http://arxiv.org/abs/1804.05090>
- 1098 84. Ziaei-Rad S, Imregun M. On the use of regularisation techniques for finite element model  
1099 updating. *Inverse Probl Eng*. 1999;7(5):471–503.
- 1100 85. Haufe S, Dähne S, Nikulin VV. Dimensionality reduction for the analysis of brain oscillations.  
1101 *NeuroImage*. novembre 2014;101:583–97.
- 1102 86. Latchoumane C-FV, Jeong J. Quantification of brain macrostates using dynamical  
1103 nonstationarity of physiological time series. *IEEE Trans Biomed Eng*. 2009;58(4):1084–1093.
- 1104 87. Safi SMM, Pooyan M, Motie Nasrabadi A. SSVEP recognition by modeling brain activity  
1105 using system identification based on Box-Jenkins model. *Comput Biol Med*. 1 ottobre  
1106 2018;101:82–9.
- 1107 88. Winkler I, Brandl S, Horn F, Waldburger E, Allefeld C, Tangermann M. Robust artifactual  
1108 independent component classification for BCI practitioners. *J Neural Eng*. 2014;11(3):035013.
- 1109 89. Markov NT, Ercsey-Ravasz MM, Gomes ARR, Lamy C, Magrou L, Vezoli J, et al. A Weighted  
1110 and Directed Interareal Connectivity Matrix for Macaque. *Cereb Cortex*. 1 gennaio  
1111 2014;24(1):17–36.
- 1112 90. Valdés-Sosa PA, Sánchez-Bornot JM, Lage-Castellanos A, Vega-Hernández M, Bosch-Bayard  
1113 J, Melie-García L, et al. Estimating brain functional connectivity with sparse multivariate  
1114 autoregression. *Philos Trans R Soc Lond B Biol Sci*. 2005;360(1457):969–981.
- 1115 91. Haufe S, Müller K-R, Nolte G, Krämer N. Sparse Causal Discovery in Multivariate Time  
1116 Series. In: *Proceedings of the 2008th International Conference on Causality: Objectives and  
1117 Assessment - Volume 6 [Internet]*. Whistler, Canada: JMLR.org; 2008 [citato 3 febbraio 2019].  
1118 pag. 97–106. (COA'08). Available at: <http://dl.acm.org/citation.cfm?id=2996801.2996808>

Running head: THE STOK FILTER FOR TIME-VARYING CONNECTIVITY

- 1119 92. Li P, Huang X, Zhu X, Liu H, Zhou W, Yao D, et al. Lp ( $p \leq 1$ ) Norm Partial Directed  
1120 Coherence for Directed Network Analysis of Scalp EEGs. *Brain Topogr.* 2018;1–15.
- 1121 93. Pagnotta MF, Plomp G, Pascucci D. A regularized and smoothed General Linear Kalman Filter  
1122 for more accurate estimation of time-varying directed connectivity\*. In: 2019 41st Annual  
1123 International Conference of the IEEE Engineering in Medicine and Biology Society (EMBC).  
1124 2019. pag. 611–5.
- 1125 94. Wackermann J, Lehmann D, Michel CM, Strik WK. Adaptive segmentation of spontaneous  
1126 EEG map series into spatially defined microstates. *Int J Psychophysiol.* 1993;14(3):269–283.
- 1127 95. Fraccaroli F, Peruffo A, Zorzi M. A new recursive least squares method with multiple  
1128 forgetting schemes. In: 2015 54th IEEE conference on decision and control (CDC). IEEE;  
1129 2015. pag. 3367–3372.
- 1130 96. Zhang L, Cai Y, Li C, de Lamare RC. Variable forgetting factor mechanisms for diffusion  
1131 recursive least squares algorithm in sensor networks. *EURASIP J Adv Signal Process.* 15  
1132 agosto 2017;2017(1):57.
- 1133 97. Skrandies W. Visual information processing: topography of brain electrical activity. *Biol*  
1134 *Psychol.* 1995;40(1–2):1–15.
- 1135 98. Florian G, Pfurtscheller G. Dynamic spectral analysis of event-related EEG data.  
1136 *Electroencephalogr Clin Neurophysiol.* 1995;95(5):393–396.
- 1137 99. Bastos AM, Schoffelen J-M. A Tutorial Review of Functional Connectivity Analysis Methods  
1138 and Their Interpretational Pitfalls. *Front Syst Neurosci.* 2016;175.
- 1139 100. Bressler SL, Seth AK. Wiener–Granger causality: a well established methodology.  
1140 *Neuroimage.* 2011;58(2):323–329.
- 1141 101. Reid AT, Headley DB, Mill RD, Sanchez-Romero R, Uddin LQ, Marinazzo D, et al.  
1142 Advancing functional connectivity research from association to causation. *Nat Neurosci.* 2019;
- 1143 102. Chen R, Wang F, Liang H, Li W. Synergistic Processing of Visual Contours across Cortical  
1144 Layers in V1 and V2. *Neuron.* 20 dicembre 2017;96(6):1388-1402.e4.
- 1145 103. Plomp G, Larderet I, Fiorini M, Busse L. Layer 3 Dynamically Coordinates Columnar Activity  
1146 According to Spatial Context. *J Neurosci.* 9 gennaio 2019;39(2):281–94.
- 1147 104. Seth AK, Barrett AB, Barnett L. Granger Causality Analysis in Neuroscience and  
1148 Neuroimaging. *J Neurosci.* 25 febbraio 2015;35(8):3293–7.
- 1149 105. Crimi A, Dodero L, Murino V, Sona D. Effective brain connectivity through a constrained  
1150 autoregressive model. In: International Conference on Medical Image Computing and  
1151 Computer-Assisted Intervention. Springer; 2016. pag. 140–147.
- 1152 106. Finger H, Bönstrup M, Cheng B, Messé A, Hilgetag C, Thomalla G, et al. Modeling of large-  
1153 scale functional brain networks based on structural connectivity from DTI: comparison with  
1154 EEG derived phase coupling networks and evaluation of alternative methods along the  
1155 modeling path. *PLoS Comput Biol.* 2016;12(8):e1005025.



Running head: THE STOK FILTER FOR TIME-VARYING CONNECTIVITY

- 1156 107. Sachdev RN, Sellien H, Ebner FF. Direct inhibition evoked by whisker stimulation in somatic  
1157 sensory (SI) barrel field cortex of the awake rat. *J Neurophysiol.* 2000;84(3):1497–1504.
- 1158 108. Wilent WB, Contreras D. Dynamics of excitation and inhibition underlying stimulus selectivity  
1159 in rat somatosensory cortex. *Nat Neurosci.* 2005;8(10):1364.
- 1160 109. Nalatore H, Rangarajan G. Short-window spectral analysis using AMVAR and multitaper  
1161 methods: a comparison. *Biol Cybern.* 1 luglio 2009;101(1):71–80.
- 1162 110. Bassett DS, Sporns O. Network neuroscience. *Nat Neurosci.* 23 febbraio 2017;20(3):353–64.
- 1163 111. Petersen SE, Sporns O. Brain Networks and Cognitive Architectures. *Neuron.* 7 ottobre  
1164 2015;88(1):207–19.
- 1165 112. Harvey AC. A unified view of statistical forecasting procedures. *J Forecast.* 1984;3(3):245–  
1166 275.
- 1167 113. Georgiadis SD, Ranta-aho PO, Tarvainen MP, Karjalainen PA. Single-trial dynamical  
1168 estimation of event-related potentials: a Kalman filter-based approach. *IEEE Trans Biomed*  
1169 *Eng.* 2005;52(8):1397–1406.
- 1170 114. Schlögl A. The electroencephalogram and the adaptive autoregressive model: theory and  
1171 applications. Shaker Aachen; 2000.
- 1172 115. Isaksson A, Wennberg A, Zetterberg LH. Computer analysis of EEG signals with parametric  
1173 models. *Proc IEEE.* 1981;69(4):451–461.
- 1174 116. Ghumare E, Schrooten M, Vandenberghe R, Dupont P. Comparison of different Kalman filter  
1175 approaches in deriving time varying connectivity from EEG data. In: 2015 37th Annual  
1176 International Conference of the IEEE Engineering in Medicine and Biology Society (EMBC).  
1177 IEEE; 2015. pag. 2199–2202.
- 1178 117. Ghumare E, Schrooten M, Vandenberghe R, Dupont P. A Time-Varying Connectivity Analysis  
1179 from Distributed EEG Sources: A Simulation Study. *Brain Topogr.* 2018;1–17.
- 1180 118. Schlogl A, Roberts SJ, Pfurtscheller G. A criterion for adaptive autoregressive models. In:  
1181 Engineering in Medicine and Biology Society, 2000 Proceedings of the 22nd Annual  
1182 International Conference of the IEEE [Internet]. IEEE; 2000. pag. 1581–1582. Available at:  
1183 <http://ieeexplore.ieee.org/abstract/document/898046/>
- 1184 119. Karasalo M, Hu X. An optimization approach to adaptive Kalman filtering. *Automatica.*  
1185 2011;47(8):1785–1793.
- 1186 120. Tsai Y-C, Lyuu Y-D. A new robust Kalman filter for filtering the microstructure noise.  
1187 *Commun Stat-Theory Methods.* 2017;46(10):4961–4976.
- 1188 121. Engl HW, Hanke M, Neubauer A. Regularization of inverse problems. Vol. 375. Springer  
1189 Science & Business Media; 1996.
- 1190 122. Hansen PC. The truncatedsvd as a method for regularization. *BIT Numer Math.*  
1191 1987;27(4):534–553.



Running head: THE STOK FILTER FOR TIME-VARYING CONNECTIVITY

- 1192 123. Navrátil P, Ivanka J. Recursive estimation algorithms in Matlab & Simulink development  
1193 environment. WSEAS Trans Comput. 2014;
- 1194 124. Enshaeifar S, Spyrou L, Sanei S, Took CC. A regularised EEG informed Kalman filtering  
1195 algorithm. Biomed Signal Process Control. 2016;25:196–200.
- 1196 125. Xia Q, Rao M, Ying Y, Shen SX, Sun Y. A new state estimation algorithm-adaptive fading  
1197 Kalman filter. In: [1992] Proceedings of the 31st IEEE Conference on Decision and Control.  
1198 IEEE; 1992. pag. 1216–1221.
- 1199 126. Astolfi L, Cincotti F, Mattia D, Marciani MG, Baccala LA, Fallani FDV, et al. Assessing  
1200 cortical functional connectivity by partial directed coherence: simulations and application to  
1201 real data. IEEE Trans Biomed Eng. 2006;53(9):1802–1812.
- 1202 127. Rodrigues J, Andrade A. Synthetic neuronal datasets for benchmarking directed functional  
1203 connectivity metrics. PeerJ. 2015;3:e923.
- 1204 128. Markov N, Ercsey-Ravasz MM, Ribeiro Gomes AR, Lamy C, Magrou L, Vezoli J, et al. A  
1205 weighted and directed interareal connectivity matrix for macaque cerebral cortex. Cereb  
1206 Cortex. 2012;24(1):17–36.
- 1207 129. Stokes PA, Purdon PL. A study of problems encountered in Granger causality analysis from a  
1208 neuroscience perspective. Proc Natl Acad Sci. 2017;114(34):E7063–E7072.
- 1209 130. Kaplan AY, Fingelkurts AA, Fingelkurts AA, Borisov SV, Darkhovsky BS. Nonstationary  
1210 nature of the brain activity as revealed by EEG/MEG: methodological, practical and conceptual  
1211 challenges. Signal Process. 2005;85(11):2190–2212.
- 1212 131. Peirce JW. Generating stimuli for neuroscience using PsychoPy. Front Neuroinformatics  
1213 [Internet]. 2008;2. Available at: <https://www.ncbi.nlm.nih.gov/pmc/articles/PMC2636899/>
- 1214 132. Bigdely-Shamlo N, Mullen T, Kothe C, Su K-M, Robbins KA. The PREP pipeline:  
1215 standardized preprocessing for large-scale EEG analysis. Front Neuroinformatics. 2015;9:16.
- 1216 133. Leske S, Dalal SS. Reducing power line noise in EEG and MEG data via spectrum  
1217 interpolation. NeuroImage. 2019;189:763–776.
- 1218 134. Delorme A, Makeig S. EEGLAB: an open source toolbox for analysis of single-trial EEG  
1219 dynamics including independent component analysis. J Neurosci Methods. 2004;134(1):9–21.
- 1220 135. Brunet D, Murray MM, Michel CM. Spatiotemporal analysis of multichannel EEG:  
1221 CARTOOL. Comput Intell Neurosci. 2011;2011:2.
- 1222 136. Daducci A, Gerhard S, Griffa A, Lemkaddem A, Cammoun L, Gigandet X, et al. The  
1223 connectome mapper: an open-source processing pipeline to map connectomes with MRI. PloS  
1224 One. 2012;7(12):e48121.
- 1225 137. Desikan RS, Ségonne F, Fischl B, Quinn BT, Dickerson BC, Blacker D, et al. An automated  
1226 labeling system for subdividing the human cerebral cortex on MRI scans into gyral based  
1227 regions of interest. Neuroimage. 2006;31(3):968–980.
- 1228 138. Braddick OJ, O’Brien JM, Wattam-Bell J, Atkinson J, Hartley T, Turner R. Brain areas  
1229 sensitive to coherent visual motion. Perception. 2001;30(1):61–72.

Running head: THE STOK FILTER FOR TIME-VARYING CONNECTIVITY

- 1230 139. Culham J, He S, Dukelow S, Verstraten FA. Visual motion and the human brain: what has  
1231 neuroimaging told us? *Acta Psychol (Amst)*. 2001;107(1–3):69–94.
- 1232 140. Rubega M, Carboni M, Seeber M, Pascucci D, Tourbier S, Toscano G, et al. Estimating EEG  
1233 source dipole orientation based on singular-value decomposition for connectivity analysis.  
1234 *Brain Topogr*. 2018;1–16.
- 1235 141. Pascual-Marqui RD, Biscay RJ, Bosch-Bayard J, Faber P, Kinoshita T, Kochi K, et al.  
1236 Innovations orthogonalization: a solution to the major pitfalls of EEG/MEG" leakage  
1237 correction". *ArXiv Prepr ArXiv170805931*. 2017;
- 1238 142. Schneider T, Neumaier A. Algorithm 808: ARfit—A Matlab package for the estimation of  
1239 parameters and eigenmodes of multivariate autoregressive models. *ACM Trans Math Softw*  
1240 *TOMS*. 2001;27(1):58–65.

1241

1242

1243

1244

1245

1246

1247

1248

1249

1250

1251
